# Supplementary material for: Two Fish in a Pod. Mislabelling on Board Threatens Sustainability in Mixed Fisheries
Source: Frontiers journal article supplement (doi:10.3389/fmars.2022.841667), 2022-03-29

**Supplementary Figure**

**Supplementary Figure 1|** Landings-value relation per species. Bar plots show weight of landings (in tonnes) and line graphs depict value (in €/kg) of black hake arrived at the port of Cadiz from 2000 to 2021 (data available until to September 2021). Data obtained from IDAPES (2021).


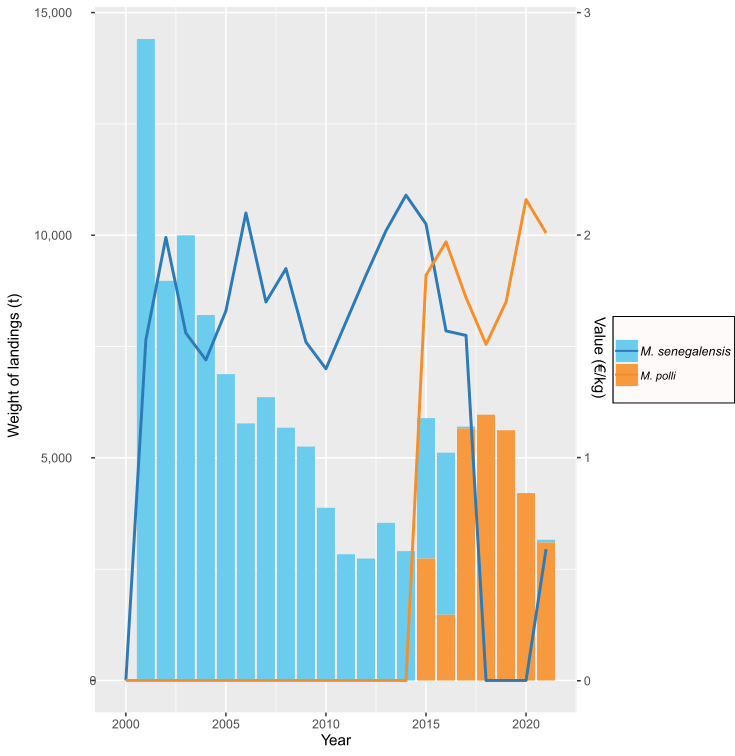

Supplement: Data_Sheet_1.docx [file Data_Sheet_1.docx]
