# Supplementary material for: Two Fish in a Pod. Mislabelling on Board Threatens Sustainability in Mixed Fisheries
Source: Frontiers journal article supplement (doi:10.3389/fmars.2022.841667), 2022-03-29
Supplement: Data_Sheet_2.xlsx [file Data_Sheet_2.xlsx]

## Sheet: Hoja1
ID	Morphological ID	Total Length (cm)	Sex (H=Female, M=Male, J=Juvenile)	Date	Time	Depth (m)	Vessel	Lat	Lon	DNA ID_ CR	ID_Seqs	Genbank ID
A01	M. polli	63.5	H	2019-11-28	03:30:00	410	Vessel 1	18.6066	-16.9033	M. polli	A01	MZ703321
A02	M. polli	57.2	H	2019-11-28	12:00:00	400	Vessel 1	18.6415	-16.8127	M. polli	A02	MZ703321
A03	M. polli	39.9	J	2019-11-28	09:30:00	390	Vessel 1	19.0485	-16.9102	M. polli	A03	MZ703321
A05	M. polli	40	J	2019-11-29	03:10:00	400	Vessel 1	18.3813	-16.7348	M. polli	A05	MZ703321
A06	M. polli	58.6	H	2019-11-29	08:25:00	380	Vessel 1	18.6302	-16.7993	M. polli	A06	MZ703321
A07	M. polli	36.8	J	2019-11-29	13:45:00	370	Vessel 1	18.3801	-16.7168	M. polli	A07	MZ703321
A08	M. polli	40.2	J	2019-11-29	19:10:00	360	Vessel 1	18.6312	-16.7901	M. polli	A08	MZ703323
A10	M. polli	34.4	J	2019-11-30	03:45:00	350	Vessel 1	19.0581	-16.8982	M. polli	A10	MZ703321
A11	M. polli	63	H	2019-11-30	13:45:00	370	Vessel 1	18.6416	-16.7949	M. polli	A11	MZ703321
A12	M. polli	48.9	H	2019-11-30	09:20:00	340	Vessel 1	18.8539	-16.882	M. polli	A12	MZ703314
A14	M. polli	59.8	H	2019-12-01	01:15:00	360	Vessel 1	19.0602	-16.9016	M. polli	A14	MZ703323
A15	M. polli	34.9	J	2019-12-01	09:28:00	315	Vessel 1	19.6073	-16.1474	M. polli	A15	MZ703321
A16	M. polli	44.8	M	2019-12-01	16:50:00	370	Vessel 1	19.7085	-17.2358	M. polli	A16	MZ703321
A18	M. polli	58.6	H	2019-12-02	01:40:00	400	Vessel 1	19.7031	-17.2542	M. polli	A18	MZ703321
A19	M. polli	49	H	2020-12-02	12:30:00	420	Vessel 1	19.6989	-17.2555	M. senegalensis	A19	MZ703374
A21	M. polli	51.1	H	2019-12-03	02:00:00	405	Vessel 1	20.3063	-17.8057	M. polli	A21	MZ703321
A22	M. polli	45.6	M	2020-12-03	08:00:00	360	Vessel 1	20.5562	-17.8847	M. senegalensis	A22	MZ703376
A24	M. polli	51.2	H	2019-12-05	03:10:00	400	Vessel 1	18.6394	-16.8103	M. polli	A24	MZ703321
A25	M. polli	47.8	H	2019-12-05	08:30:00	380	Vessel 1	18.3778	-16.7223	M. polli	A25	MZ703321
A26	M. polli	56.4	H	2019-12-05	15:40:00	370	Vessel 1	18.0514	-16.6443	M. polli	A26	MZ703321
A28	M. polli	57	H	2019-12-06	00:00:00	390	Vessel 1	18.3661	-16.7265	M. polli	A28	MZ703315
A29	M. polli	49.4	H	2019-12-06	05:35:00	410	Vessel 1	18.0613	-16.6633	M. polli	A29	MZ703322
A30	M. polli	54.7	H	2019-12-06	12:30:00	430	Vessel 1	18.3726	-16.7404	M. polli	A30	MZ703316
A31	M. polli	46.8	M	2019-12-06	19:50:00	385	Vessel 1	18.0559	-16.6501	M. polli	A31	MZ703321
A33	M. polli	40.2	M	2020-12-07	02:25:00	405	Vessel 1	18.3795	-16.7402	M. senegalensis	A33	MZ703376
A34	M. polli	43.5	H	2020-12-07	08:00:00	400	Vessel 1	18.6243	-16.8095	M. senegalensis	A34	MZ703376
A35	M. polli	36	J	2020-12-07	17:15:00	370	Vessel 1	19.0611	-16.9044	M. senegalensis	A35	MZ703374
A37	M. polli	55.2	H	2020-12-08	02:10:00	410	Vessel 1	18.6412	-16.818	M. senegalensis	A37	MZ703376
A38	M. polli	57.4	H	2020-12-08	07:20:00	410	Vessel 1	18.3817	-16.739	M. senegalensis	A38	MZ703376
A39	M. polli	32.8	J	2020-12-08	11:30:00	90	Vessel 1	18.6719	-16.6288	M. senegalensis	A39	MZ703376
A40	M. polli	33.6	J	2020-12-08	15:00:00	80	Vessel 1	18.7307	-16.6223	M. senegalensis	A40	MZ703376
A42	M. polli	54.1	H	2019-12-09	00:40:00	350	Vessel 1	19.0507	-16.8977	M. polli	A42	MZ703323
A43	M. polli	41	J	2020-12-09	09:20:00	310	Vessel 1	19.6092	-17.1431	M. senegalensis	A43	MZ703376
A44	M. polli	39	J	2019-12-09	14:40:00	330	Vessel 1	19.6067	-17.1475	M. polli	A44	MZ703321
A45	M. polli	47	M	2019-12-09	23:54:00	355	Vessel 1	19.716	-17.1766	M. polli	A45	MZ703317
A47	M. polli	40.5	J	2019-12-12	09:00:00	400	Vessel 1	20.4487	-17.8899	M. polli	A47	MZ703318
A48	M. polli	55.6	H	2019-12-12	21:10:00	410	Vessel 1	20.7555	-17.8224	M. polli	A48	MZ703321
A50	M. polli	58.6	H	2019-12-13	06:00:00	390	Vessel 1	20.3966	-17.8398	M. polli	A50	MZ703319
A51	M. polli	39	J	2019-12-13	19:35:00	360	Vessel 1	19.5961	-17.1614	M. polli	A51	MZ703353
A53	M. polli	61.4	H	2019-12-14	03:00:00	390	Vessel 1	19.7068	-17.2482	M. polli	A53	MZ703321
A54	M. polli	53.7	H	2020-12-14	16:10:00	370	Vessel 1	18.6399	-16.7971	M. senegalensis	A54	MZ703375
A55	M. polli	57.1	H	2019-12-14	21:00:00	370	Vessel 1	18.3826	-16.7207	M. polli	A55	MZ703323
A57	M. polli	56	M	2019-12-15	04:30:00	390	Vessel 1	18.0533	-16.6533	M. polli	A57	MZ703323
A58	M. polli	60.9	H	2019-12-15	11:25:00	410	Vessel 1	18.3811	-16.7371	M. polli	A58	MZ703321
A59	M. polli	57.1	H	2019-12-15	16:40:00	400	Vessel 1	18.6259	-16.8087	M. polli	A59	MZ703321
A61	M. polli	44.8	M	2019-12-16	01:25:00	350	Vessel 1	19.0576	-16.8973	M. polli	A61	MZ703321
A62	M. polli	47.9	M	2019-12-16	14:15:00	355	Vessel 1	19.2405	-16.8991	M. polli	A62	MZ703323
A63	M. polli	55.5	H	2019-12-16	21:00:00	370	Vessel 1	19.2672	-16.9723	M. polli	A63	MZ703323
A65	M. polli	45.6	M	2019-12-17	06:30:00	370	Vessel 1	19.708	-17.2382	M. polli	A65	MZ703321
A67	M. polli	59.1	H	2019-12-19	08:15:00	400	Vessel 1	20.6955	-17.9092	M. polli	A67	MZ703321
A68	M. polli	62	H	2019-12-19	18:30:00	390	Vessel 1	20.3891	-17.8335	M. polli	A68	MZ703321
A70	M. polli	57.8	H	2019-12-20	03:15:00	410	Vessel 1	20.75	-17.8351	M. polli	A70	MZ703323
A71	M. polli	60.1	H	2019-12-20	11:45:00	420	Vessel 1	20.3244	-17.8202	M. polli	A71	MZ703321
A72	M. polli	47	M	2020-12-20	20:00:00	380	Vessel 1	20.7626	-17.7662	M. senegalensis	A72	MZ703376
A74	M. polli	51	H	2019-12-21	06:00:00	400	Vessel 1	20.3708	-17.8372	M. polli	A74	MZ703321
A75	M. polli	45.9	M	2019-12-21	15:00:00	370	Vessel 1	20.7587	-17.7712	M. polli	A75	MZ703321
A77	M. polli	46	M	2019-12-22	00:10:00	360	Vessel 1	20.4311	-17.8393	M. polli	A77	MZ703320
A78	M. polli	53.2	H	2019-12-22	05:05:00	415	Vessel 1	20.7584	-17.8171	M. polli	A78	MZ703321
A79	M. polli	59.9	H	2019-12-22	16:15:00	390	Vessel 1	20.3288	-17.3039	M. polli	A79	MZ703322
A81	M. polli	48.7	M	2019-12-23	00:05:00	300	Vessel 1	20.6914	-17.8176	M. polli	A81	MZ703321
B01	M. polli	37.5	J	2019-12-23	04:00:00	320	Vessel 1	20.3286	-17.7681	M. polli	B01	MZ703323
B02	M. polli	38.1	M	2019-12-23	11:00:00	350	Vessel 1	20.6259	-17.9257	M. polli	B02	MZ703323
B03	M. polli	46.2	J	2020-12-23	17:30:00	370	Vessel 1	20.3254	-17.7932	M. senegalensis	B03	MZ703376
B05	M. polli	36.9	J	2019-12-24	01:00:00	320	Vessel 1	20.6751	-17.8585	M. polli	B05	MZ703321
B07	M. polli	62.5	H	2019-12-26	02:45:00	415	Vessel 1	18.6415	-16.8174	M. polli	B07	MZ703321
B08	M. polli	57	H	2019-12-26	08:30:00	360	Vessel 1	18.3812	-16.7153	M. polli	B08	MZ703321
B09	M. polli	54.2	H	2019-12-26	15:15:00	380	Vessel 1	18.0548	-16.6499	M. polli	B09	MZ703323
B11	M. polli	42.5	M	2019-12-27	00:05:00	370	Vessel 1	18.3891	-16.7228	M. polli	B11	MZ703321
B12	M. polli	50.5	H	2019-12-27	08:45:00	370	Vessel 1	19.3908	-16.9041	M. polli	B12	MZ703324
B13	M. polli	54	H	2019-12-27	17:30:00	380	Vessel 1	19.6413	-16.8038	M. polli	B13	MZ703321
B15	M. polli	54.8	H	2019-12-28	00:05:00	350	Vessel 1	18.3848	-16.7103	M. polli	B15	MZ703325
B16	M. polli	53.5	H	2019-12-28	04:15:00	335	Vessel 1	18.635	-16.7796	M. polli	B16	MZ703323
B18	M. polli	35	J	2019-12-28	09:30:00	360	Vessel 1	18.3804	-16.715	M. polli	B18	MZ703321
B19	M. polli	64.2	H	2019-12-28	16:35:00	420	Vessel 1	18.0605	-16.6653	M. polli	B19	MZ703326
B20	M. polli	34.7	J	2019-12-28	23:00:00	290	Vessel 1	18.0418	-16.6205	M. polli	B20	MZ703321
B22	M. polli	33.8	J	2019-12-29	05:10:00	300	Vessel 1	17.7457	-16.6934	M. polli	B22	MZ703323
B23	M. polli	35.3	J	2019-12-29	10:30:00	320	Vessel 1	18.0281	-16.6242	M. polli	B23	MZ703322
B24	M. polli	58.1	H	2019-12-29	16:00:00	400	Vessel 1	18.0423	-16.6859	M. polli	B24	MZ703321
B26	M. polli	36	J	2019-12-30	04:50:00	350	Vessel 1	18.6369	-16.7868	M. polli	B26	MZ703321
B27	M. polli	35.1	J	2019-12-30	09:00:00	90	Vessel 1	18.6982	-16.6075	M. polli	B27	MZ703321
B28	M. polli	22.5	J	2019-12-30	18:20:00	350	Vessel 1	19.0588	-16.8992	M. polli	B28	MZ703323
B30	M. polli	47.1	M	2020-01-02	17:30:00	370	Vessel 1	18.6441	-16.7985	M. polli	B30	MZ703321
B31	M. polli	34.8	J	2020-01-02	23:00:00	380	Vessel 1	18.3809	-16.725	M. polli	B31	MZ703327
B33	M. polli	31.5	J	2020-01-03	05:50:00	355	Vessel 1	18.0497	-16.6396	M. polli	B33	MZ703321
B34	M. polli	50.2	H	2020-01-03	12:00:00	375	Vessel 1	17.7731	-16.7374	M. polli	B34	MZ703333
B35	M. polli	33.5	J	2020-01-03	17:30:00	350	Vessel 1	18.0365	-16.6365	M. polli	B35	MZ703321
B37	M. polli	33	J	2020-01-04	00:05:00	350	Vessel 1	17.7706	-16.7192	M. polli	B37	MZ703321
B38	M. polli	34.2	J	2020-01-04	05:05:00	330	Vessel 1	18.0297	-16.6291	M. polli	B38	MZ703328
B39	M. polli	41.3	M	2020-01-04	10:30:00	360	Vessel 1	18.0513	-16.6451	M. senegalensis	B39	MZ703376
B40	M. polli	35.7	J	2020-01-04	17:35:00	385	Vessel 1	18.3869	-16.7271	M. polli	B40	MZ703322
B42	M. polli	38	M	2020-01-05	00:25:00	400	Vessel 1	18.0615	-16.6584	M. polli	B42	MZ703321
B43	M. polli	34.2	J	2020-01-05	06:00:00	380	Vessel 1	17.7727	-16.7462	M. polli	B43	MZ703329
B44	M. polli	32.5	J	2020-01-05	13:15:00	310	Vessel 1	17.42	-16.7342	M. polli	B44	MZ703330
B45	M. polli	31.1	J	2020-01-05	20:20:00	300	Vessel 1	17.0604	-16.8405	M. polli	B45	MZ703321
B47	M. polli	36.9	J	2020-01-06	02:50:00	305	Vessel 1	18.0226	-16.6225	M. polli	B47	MZ703331
B48	M. polli	34	J	2020-01-06	09:30:00	330	Vessel 1	18.3942	-16.7071	M. polli	B48	MZ703371
B49	M. polli	42.5	M	2020-01-06	15:25:00	340	Vessel 1	18.6335	-16.7806	M. polli	B49	MZ703321
B51	M. polli	48.1	M	2020-01-07	1900-01-04	350	Vessel 1	19.0519	-16.8996	M. polli	B51	MZ703332
B52	M. polli	41.3	J	2020-01-07	09:45:00	290	Vessel 1	19.7325	-17.1708	M. polli	B52	MZ703371
B54	M. polli	62.2	H	2020-01-09	04:00:00	415	Vessel 1	18.6427	-16.8196	M. polli	B54	MZ703317
B55	M. polli	53.9	H	2020-01-09	09:45:00	350	Vessel 1	18.3825	-16.7129	M. polli	B55	MZ703321
B56	M. polli	57.1	H	2020-01-09	16:50:00	375	Vessel 1	18.0519	-16.6434	M. polli	B56	MZ703333
B57	M. polli	61.9	H	2020-01-09	23:00:00	340	Vessel 1	18.0491	-16.636	M. polli	B57	MZ703333
B59	M. polli	53.3	H	2020-01-10	06:30:00	320	Vessel 1	18.3946	-16.7048	M. polli	B59	MZ703321
B60	M. polli	39.9	J	2020-01-10	11:55:00	345	Vessel 1	18.6377	-16.7858	M. polli	B60	MZ703329
B61	M. polli	38.7	J	2020-01-10	17:35:00	320	Vessel 1	18.3881	-16.6981	M. polli	B61	MZ703323
B63	M. polli	46	M	2020-01-10	23:35:00	310	Vessel 1	18.2863	-16.6528	M. polli	B63	MZ703323
B65	M. polli	56.1	H	2020-01-11	03:15:00	385	Vessel 1	18.6273	-16.8009	M. senegalensis	B65	MZ703376
B66	M. polli	47.2	M	2020-01-11	08:00:00	360	Vessel 1	18.8497	-16.8834	M. polli	B66	MZ703321
B67	M. polli	42	J	2020-01-11	12:00:00	350	Vessel 1	19.0578	-16.8962	M. polli	B67	MZ703322
B68	M. polli	43	J	2020-01-11	19:45:00	300	Vessel 1	18.667	-16.761	M. polli	B68	MZ703323
B70	M. polli	49.1	H	2020-01-12	02:30:00	350	Vessel 1	18.9009	-16.8838	M. polli	B70	MZ703321
B71	M. polli	57.3	H	2020-01-12	08:55:00	370	Vessel 1	18.6416	-16.7971	M. senegalensis	B71	MZ703376
B73	M. polli	40.5	J	2020-01-12	13:45:00	330	Vessel 1	18.659	-16.7787	M. polli	B73	MZ703321
B75	M. polli	48	H	2020-01-12	22:00:00	380	Vessel 1	18.0562	-16.9056	M. polli	B75	MZ703321
B76	M. polli	46.3	M	2020-01-13	07:30:00	315	Vessel 1	19.6019	-17.1442	M. polli	B76	MZ703323
B78	M. polli	45.9	H	2020-01-13	12:05:00	350	Vessel 1	19.6017	-17.1515	M. polli	B78	MZ703321
B80	M. polli	46.1	M	2020-01-13	17:15:00	370	Vessel 1	19.709	-17.234	M. polli	B80	MZ703323
B81	M. polli	40.7	J	2020-01-13	23:45:00	310	Vessel 1	19.6128	-17.1388	M. polli	B81	MZ703323
C01	M. polli	49	H	2019-12-04	15:00:00	500	Vessel 2	18.75	-16.8333	M. polli	C01	MZ703321
C02	M. polli	47	H	2019-12-04	15:00:00	500	Vessel 2	18.75	-16.8333	M. polli	C02	MZ703321
C03	M. polli	43	H	2019-12-04	15:00:00	500	Vessel 2	18.75	-16.8333	M. polli	C03	MZ703321
C04	M. polli	44	H	2020-12-04	15:00:00	500	Vessel 2	18.75	-16.8333	M. senegalensis	C04	MZ703376
C05	M. polli	46	M	2019-12-04	15:00:00	500	Vessel 2	18.75	-16.8333	M. polli	C05	MZ703321
C06	M. polli	42	M	2020-12-04	15:00:00	500	Vessel 2	18.75	-16.8333	M. senegalensis	C06	MZ703376
C07	M. polli	43	H	2020-12-04	15:00:00	500	Vessel 2	18.75	-16.8333	M. senegalensis	C07	MZ703387
C08	M. polli	43	M	2020-12-04	15:00:00	500	Vessel 2	18.75	-16.8333	M. senegalensis	C08	MZ703376
C09	M. polli	44	M	2020-12-04	15:00:00	500	Vessel 2	18.75	-16.8333	M. senegalensis	C09	MZ703376
C10	M. polli	53	H	2019-12-04	15:00:00	500	Vessel 2	18.75	-16.8333	M. polli	C10	MZ703325
C11	M. polli	55	H	2019-12-04	15:00:00	500	Vessel 2	18.75	-16.8333	M. polli	C11	MZ703323
C12	M. polli	59	H	2019-12-04	15:00:00	500	Vessel 2	18.75	-16.8333	M. polli	C12	MZ703321
C13	M. polli	52	H	2019-12-04	15:00:00	500	Vessel 2	18.75	-16.8333	M. polli	C13	MZ703321
C14	M. polli	51	H	2019-12-04	15:00:00	500	Vessel 2	18.75	-16.8333	M. polli	C14	MZ703321
C15	M. polli	51.5	H	2019-12-04	15:00:00	500	Vessel 2	18.75	-16.8333	M. polli	C15	MZ703353
C16	M. polli	47.5	H	2019-12-04	15:00:00	500	Vessel 2	18.75	-16.8333	M. polli	C16	MZ703321
C17	M. polli	46	H	2019-12-04	15:00:00	500	Vessel 2	18.75	-16.8333	M. polli	C17	MZ703321
C18	M. polli	50	H	2019-12-04	15:00:00	500	Vessel 2	18.75	-16.8333	M. polli	C18	MZ703321
C20	M. polli	46	M	2020-12-04	15:00:00	500	Vessel 2	18.75	-16.8333	M. senegalensis	C20	MZ703376
C21	M. polli	48	H	2019-12-04	15:00:00	500	Vessel 2	18.75	-16.8333	M. polli	C21	MZ703321
C22	M. polli	52	M	2019-12-04	15:00:00	500	Vessel 2	18.75	-16.8333	M. polli	C22	MZ703321
C23	M. polli	51.5	M	2019-12-04	15:00:00	500	Vessel 2	18.75	-16.8333	M. polli	C23	MZ703321
C24	M. polli	50	M	2019-12-04	15:00:00	500	Vessel 2	18.75	-16.8333	M. polli	C24	MZ703321
C25	M. polli	46	M	2019-12-04	15:00:00	500	Vessel 2	18.75	-16.8333	M. polli	C25	MZ703321
C26	M. polli	47.6	M	2019-12-04	15:00:00	500	Vessel 2	18.75	-16.8333	M. polli	C26	MZ703338
C27	M. polli	56	M	2019-12-04	15:00:00	500	Vessel 2	18.75	-16.8333	M. senegalensis	C27	MZ703374
C28	M. polli	29	J	2019-12-05	14:00:00	540	Vessel 2	18.3	-16.6667	M. polli	C28	MZ703323
C29	M. polli	30.5	J	2019-12-05	14:00:00	540	Vessel 2	18.3	-16.6667	M. polli	C29	MZ703323
C30	M. polli	33.5	J	2019-12-05	14:00:00	540	Vessel 2	18.3	-16.6667	M. polli	C30	MZ703321
C31	M. polli	32.2	J	2019-12-05	14:00:00	540	Vessel 2	18.3	-16.6667	M. polli	C31	MZ703321
C32	M. polli	32	J	2019-12-05	14:00:00	540	Vessel 2	18.3	-16.6667	M. polli	C32	MZ703339
C33	M. polli	38	J	2019-12-05	14:00:00	540	Vessel 2	18.3	-16.6667	M. polli	C33	MZ703323
C34	M. polli	31	J	2019-12-05	14:00:00	540	Vessel 2	18.3	-16.6667	M. polli	C34	MZ703321
C35	M. polli	33	J	2019-12-05	14:00:00	540	Vessel 2	18.3	-16.6667	M. polli	C35	MZ703321
C36	M. polli	30	J	2019-12-05	14:00:00	540	Vessel 2	18.3	-16.6667	M. polli	C36	MZ703321
C37	M. polli	31	J	2019-12-05	14:00:00	540	Vessel 2	18.3	-16.6667	M. polli	C37	MZ703323
C38	M. polli	33	J	2019-12-05	14:00:00	540	Vessel 2	18.3	-16.6667	M. polli	C38	MZ703321
C39	M. polli	30	J	2019-12-05	14:00:00	540	Vessel 2	18.3	-16.6667	M. polli	C39	MZ703321
C40	M. polli	31.5	J	2019-12-05	14:00:00	540	Vessel 2	18.3	-16.6667	M. polli	C40	MZ703323
C41	M. polli	34	J	2019-12-05	14:00:00	540	Vessel 2	18.3	-16.6667	M. polli	C41	MZ703321
C42	M. polli	48	H	2019-12-18	17:00:00	560	Vessel 2	18.7833	-16.85	M. polli	C42	MZ703321
C43	M. polli	50	H	2020-12-18	17:00:00	560	Vessel 2	18.7833	-16.85	M. senegalensis	C43	MZ703376
C44	M. polli	44	M	2019-12-18	17:00:00	560	Vessel 2	18.7833	-16.85	M. polli	C44	MZ703323
C45	M. polli	47	M	2019-12-18	17:00:00	560	Vessel 2	18.7833	-16.85	M. polli	C45	MZ703322
C46	M. polli	50	H	2019-12-18	17:00:00	560	Vessel 2	18.7833	-16.85	M. polli	C46	MZ703321
C48	M. polli	48	H	2019-12-18	17:00:00	560	Vessel 2	18.7833	-16.85	M. polli	C48	MZ703353
C49	M. polli	56.5	H	2019-12-18	17:00:00	560	Vessel 2	18.7833	-16.85	M. polli	C49	MZ703322
C50	M. polli	32	J	2019-12-18	17:00:00	560	Vessel 2	18.7833	-16.85	M. polli	C50	MZ703340
C51	M. polli	48	M	2019-12-18	17:00:00	560	Vessel 2	18.7833	-16.85	M. polli	C51	MZ703323
C52	M. polli	48	M	2019-12-18	17:00:00	560	Vessel 2	18.7833	-16.85	M. polli	C52	MZ703321
C53	M. polli	28.2	J	2019-12-18	17:00:00	560	Vessel 2	18.7833	-16.85	M. polli	C53	MZ703321
C54	M. polli	31.5	J	2019-12-18	17:00:00	560	Vessel 2	18.7833	-16.85	M. polli	C54	MZ703321
C55	M. polli	53.5	H	2020-12-18	17:00:00	560	Vessel 2	18.7833	-16.85	M. senegalensis	C55	MZ703374
C56	M. polli	53	M	2019-12-18	17:00:00	560	Vessel 2	18.7833	-16.85	M. polli	C56	MZ703341
C57	M. polli	33	J	2019-12-18	17:00:00	560	Vessel 2	18.7833	-16.85	M. polli	C57	MZ703317
C58	M. polli	34	J	2019-12-18	17:00:00	560	Vessel 2	18.7833	-16.85	M. polli	C58	MZ703317
C59	M. polli	55	M	2019-12-18	17:00:00	560	Vessel 2	18.7833	-16.85	M. polli	C59	MZ703325
C60	M. polli	34	J	2019-12-18	17:00:00	560	Vessel 2	18.7833	-16.85	M. polli	C60	MZ703317
C61	M. polli	32	J	2019-12-18	17:00:00	560	Vessel 2	18.7833	-16.85	M. polli	C61	MZ703317
C62	M. polli	50	M	2020-12-18	17:00:00	560	Vessel 2	18.7833	-16.85	M. senegalensis	C62	MZ703382
C63	M. polli	52.5	H	2019-12-18	17:00:00	560	Vessel 2	18.7833	-16.85	M. polli	C63	MZ703321
C64	M. polli	51.5	H	2019-12-18	17:00:00	560	Vessel 2	18.7833	-16.85	M. polli	C64	MZ703322
C65	M. polli	57	H	2019-12-18	17:00:00	560	Vessel 2	18.7833	-16.85	M. polli	C65	MZ703317
C66	M. polli	47	H	2019-12-18	17:00:00	560	Vessel 2	18.7833	-16.85	M. polli	C66	MZ703321
C67	M. polli	45	M	2019-12-18	17:00:00	560	Vessel 2	18.7833	-16.85	M. polli	C67	MZ703321
C68	M. polli	44.5	M	2019-12-18	17:00:00	560	Vessel 2	18.7833	-16.85	M. polli	C68	MZ703321
C69	M. polli	48	M	2019-12-18	17:00:00	560	Vessel 2	18.7833	-16.85	M. polli	C69	MZ703323
C70	M. polli	52.2	M	2019-12-18	17:00:00	560	Vessel 2	18.7833	-16.85	M. polli	C70	MZ703353
C71	M. polli	48	H	2020-12-18	17:00:00	560	Vessel 2	18.7833	-16.85	M. senegalensis	C71	MZ703383
C72	M. polli	32	J	2019-12-18	17:00:00	560	Vessel 2	18.7833	-16.85	M. polli	C72	MZ703321
C73	M. polli	50	H	2019-12-18	17:00:00	560	Vessel 2	18.7833	-16.85	M. polli	C73	MZ703321
C74	M. polli	49.5	M	2019-12-18	17:00:00	560	Vessel 2	18.7833	-16.85	M. polli	C74	MZ703321
C75	M. polli	54	M	2019-12-18	17:00:00	560	Vessel 2	18.7833	-16.85	M. polli	C75	MZ703323
C76	M. polli	53.5	H	2019-12-18	17:00:00	560	Vessel 2	18.7833	-16.85	M. polli	C76	MZ703342
C77	M. polli	35.5	J	2019-12-18	17:00:00	560	Vessel 2	18.7833	-16.85	M. polli	C77	MZ703343
C78	M. polli	58	H	2019-12-18	17:00:00	560	Vessel 2	18.7833	-16.85	M. polli	C78	MZ703344
C79	M. polli	49	M	2020-12-18	17:00:00	560	Vessel 2	18.7833	-16.85	M. senegalensis	C79	MZ703384
C80	M. polli	52.5	H	2019-12-18	17:00:00	560	Vessel 2	18.7833	-16.85	M. polli	C80	MZ703321
C81	M. polli	48	H	2020-12-18	17:00:00	560	Vessel 2	18.7833	-16.85	M. senegalensis	C81	MZ703385
D01	M. polli	46	M	2019-12-20	16:00:00	564	Vessel 2	18.0333	-16.6167	M. polli	D01	MZ703325
D02	M. polli	49	M	2019-12-20	16:00:00	564	Vessel 2	18.0333	-16.6167	M. polli	D02	MZ703345
D03	M. polli	46.5	H	2019-12-20	16:00:00	564	Vessel 2	18.0333	-16.6167	M. polli	D03	MZ703346
D04	M. polli	59.5	H	2019-12-20	16:00:00	564	Vessel 2	18.0333	-16.6167	M. polli	D04	MZ703347
D05	M. polli	31.5	J	2019-12-20	16:00:00	564	Vessel 2	18.0333	-16.6167	M. polli	D05	MZ703348
D06	M. polli	49	H	2019-12-20	16:00:00	564	Vessel 2	18.0333	-16.6167	M. polli	D06	MZ703346
D07	M. polli	65	H	2019-12-20	16:00:00	564	Vessel 2	18.0333	-16.6167	M. polli	D07	MZ703349
D08	M. polli	52	M	2019-12-20	16:00:00	564	Vessel 2	18.0333	-16.6167	M. polli	D08	MZ703350
D09	M. polli	55	M	2019-12-20	16:00:00	564	Vessel 2	18.0333	-16.6167	M. polli	D09	MZ703351
D10	M. polli	48.5	H	2019-12-20	16:00:00	564	Vessel 2	18.0333	-16.6167	M. polli	D10	MZ703321
D11	M. polli	31	J	2019-12-20	16:00:00	564	Vessel 2	18.0333	-16.6167	M. polli	D11	MZ703321
D12	M. polli	47	H	2019-12-20	16:00:00	564	Vessel 2	18.0333	-16.6167	M. polli	D12	MZ703323
D13	M. polli	53	H	2019-12-20	16:00:00	564	Vessel 2	18.0333	-16.6167	M. polli	D13	MZ703321
D14	M. polli	31	J	2019-12-20	16:00:00	564	Vessel 2	18.0333	-16.6167	M. polli	D14	MZ703321
D15	M. polli	49.5	M	2019-12-20	16:00:00	564	Vessel 2	18.0333	-16.6167	M. polli	D15	MZ703323
D16	M. polli	32	J	2019-12-20	16:00:00	564	Vessel 2	18.0333	-16.6167	M. polli	D16	MZ703321
D17	M. polli	48	H	2019-12-20	16:00:00	564	Vessel 2	18.0333	-16.6167	M. polli	D17	MZ703321
D18	M. polli	51	H	2019-12-20	16:00:00	564	Vessel 2	18.0333	-16.6167	M. polli	D18	MZ703321
D20	M. polli	47.5	H	2019-12-20	16:00:00	564	Vessel 2	18.0333	-16.6167	M. polli	D20	MZ703322
D21	M. polli	32	J	2019-12-20	16:00:00	564	Vessel 2	18.0333	-16.6167	M. polli	D21	MZ703321
D22	M. polli	38.5	J	2019-12-20	16:00:00	564	Vessel 2	18.0333	-16.6167	M. polli	D22	MZ703352
D23	M. polli	56.5	M	2019-12-20	16:00:00	564	Vessel 2	18.0333	-16.6167	M. polli	D23	MZ703325
D24	M. polli	47	H	2019-12-20	16:00:00	564	Vessel 2	18.0333	-16.6167	M. polli	D24	MZ703321
D25	M. polli	31	J	2019-12-20	16:00:00	564	Vessel 2	18.0333	-16.6167	M. polli	D25	MZ703321
D26	M. polli	54	H	2019-12-20	16:00:00	564	Vessel 2	18.0333	-16.6167	M. polli	D26	MZ703321
D27	M. polli	26.5	J	2019-12-20	16:00:00	564	Vessel 2	18.0333	-16.6167	M. polli	D27	MZ703321
D28	M. polli	46.3	M	2019-12-20	16:00:00	564	Vessel 2	18.0333	-16.6167	M. polli	D28	MZ703321
D29	M. polli	48.5	H	2019-12-20	16:00:00	564	Vessel 2	18.0333	-16.6167	M. polli	D29	MZ703353
D30	M. polli	51	H	2019-12-20	16:00:00	564	Vessel 2	18.0333	-16.6167	M. polli	D30	MZ703321
D31	M. polli	53.5	H	2019-12-20	16:00:00	564	Vessel 2	18.0333	-16.6167	M. polli	D31	MZ703321
D32	M. polli	50.2	M	2019-12-20	16:00:00	564	Vessel 2	18.0333	-16.6167	M. polli	D32	MZ703353
D33	M. polli	31	J	2019-12-20	16:00:00	564	Vessel 2	18.0333	-16.6167	M. polli	D33	MZ703325
D34	M. polli	33.5	J	2019-12-20	16:00:00	564	Vessel 2	18.0333	-16.6167	M. polli	D34	MZ703325
D35	M. polli	30.2	J	2019-12-20	16:00:00	564	Vessel 2	18.0333	-16.6167	M. polli	D35	MZ703321
D36	M. polli	50	M	2019-12-20	16:00:00	564	Vessel 2	18.0333	-16.6167	M. polli	D36	MZ703321
D37	M. polli	31.8	J	2019-12-20	16:00:00	564	Vessel 2	18.0333	-16.6167	M. polli	D37	MZ703321
D38	M. polli	45	M	2020-12-20	16:00:00	564	Vessel 2	18.0333	-16.6167	M. senegalensis	D38	MZ703376
D39	M. polli	50	M	2020-12-20	16:00:00	564	Vessel 2	18.0333	-16.6167	M. polli	D39	MZ703317
D40	M. polli	47	M	2019-12-20	16:00:00	564	Vessel 2	18.0333	-16.6167	M. polli	D40	MZ703321
D41	M. polli	32.7	J	2020-12-29	19:00:00	512	Vessel 2	20.4667	-17.8333	M. senegalensis	D41	MZ703376
D42	M. polli	43.5	H	2020-12-29	19:00:00	512	Vessel 2	20.4667	-17.8333	M. senegalensis	D42	MZ703376
D43	M. polli	43.3	H	2020-12-29	19:00:00	512	Vessel 2	20.4667	-17.8333	M. senegalensis	D43	MZ703376
D44	M. polli	47.5	H	2020-12-29	19:00:00	512	Vessel 2	20.4667	-17.8333	M. senegalensis	D44	MZ703376
D45	M. polli	35	J	2020-12-29	19:00:00	512	Vessel 2	20.4667	-17.8333	M. senegalensis	D45	MZ703376
D46	M. polli	45.7	M	2020-12-29	19:00:00	512	Vessel 2	20.4667	-17.8333	M. senegalensis	D46	MZ703376
D47	M. polli	47.5	M	2019-12-29	19:00:00	512	Vessel 2	20.4667	-17.8333	M. polli	D47	MZ703321
D48	M. polli	34.5	J	2019-12-29	19:00:00	512	Vessel 2	20.4667	-17.8333	M. polli	D48	MZ703323
D49	M. polli	30.5	J	2020-12-29	19:00:00	512	Vessel 2	20.4667	-17.8333	M. senegalensis	D49	MZ703376
D50	M. polli	36	J	2020-12-29	19:00:00	512	Vessel 2	20.4667	-17.8333	M. senegalensis	D50	MZ703374
D51	M. polli	31.5	J	2020-12-29	19:00:00	512	Vessel 2	20.4667	-17.8333	M. senegalensis	D51	MZ703376
D52	M. polli	34.5	J	2020-12-29	19:00:00	512	Vessel 2	20.4667	-17.8333	M. senegalensis	D52	MZ703386
D53	M. polli	33.5	J	2020-12-29	19:00:00	512	Vessel 2	20.4667	-17.8333	M. senegalensis	D53	MZ703387
D54	M. polli	51.5	H	2019-12-29	19:00:00	512	Vessel 2	20.4667	-17.8333	M. polli	D54	MZ703317
D55	M. polli	47.2	M	2020-12-29	19:00:00	512	Vessel 2	20.4667	-17.8333	M. senegalensis	D55	MZ703393
D56	M. polli	34.7	J	2020-12-29	19:00:00	512	Vessel 2	20.4667	-17.8333	M. senegalensis	D56	MZ703376
D57	M. polli	48	M	2020-12-29	19:00:00	512	Vessel 2	20.4667	-17.8333	M. senegalensis	D57	MZ703376
D58	M. polli	45	H	2020-12-29	19:00:00	512	Vessel 2	20.4667	-17.8333	M. senegalensis	D58	MZ703376
D59	M. polli	52	M	2020-12-29	19:00:00	512	Vessel 2	20.4667	-17.8333	M. senegalensis	D59	MZ703376
D60	M. polli	35	J	2020-12-29	19:00:00	512	Vessel 2	20.4667	-17.8333	M. senegalensis	D60	MZ703376
D61	M. polli	35	J	2020-12-29	19:00:00	512	Vessel 2	20.4667	-17.8333	M. senegalensis	D61	MZ703376
D62	M. polli	46.8	M	2019-12-29	19:00:00	512	Vessel 2	20.4667	-17.8333	M. polli	D62	MZ703334
D63	M. polli	51	H	2019-12-29	19:00:00	512	Vessel 2	20.4667	-17.8333	M. polli	D63	MZ703323
D64	M. polli	33	J	2020-12-29	19:00:00	512	Vessel 2	20.4667	-17.8333	M. senegalensis	D64	MZ703374
D65	M. polli	43	H	2020-12-29	19:00:00	512	Vessel 2	20.4667	-17.8333	M. senegalensis	D65	MZ703376
D66	M. polli	35.5	J	2020-12-29	19:00:00	512	Vessel 2	20.4667	-17.8333	M. senegalensis	D66	MZ703376
D67	M. polli	44.5	M	2019-12-29	19:00:00	512	Vessel 2	20.4667	-17.8333	M. polli	D67	MZ703321
D68	M. polli	36	J	2020-12-29	19:00:00	512	Vessel 2	20.4667	-17.8333	M. senegalensis	D68	MZ703376
D69	M. polli	53	M	2020-12-29	19:00:00	512	Vessel 2	20.4667	-17.8333	M. senegalensis	D69	MZ703374
D70	M. polli	33.5	J	2019-12-29	19:00:00	512	Vessel 2	20.4667	-17.8333	M. polli	D70	MZ703323
D71	M. polli	47	H	2020-12-29	19:00:00	512	Vessel 2	20.4667	-17.8333	M. senegalensis	D71	MZ703376
D72	M. polli	33.5	J	2020-12-29	19:00:00	512	Vessel 2	20.4667	-17.8333	M. senegalensis	D72	MZ703376
D74	M. polli	47	M	2019-12-29	19:00:00	512	Vessel 2	20.4667	-17.8333	M. polli	D74	MZ703321
D75	M. polli	33	J	2019-12-29	19:00:00	512	Vessel 2	20.4667	-17.8333	M. polli	D75	MZ703321
D76	M. polli	33.5	J	2019-12-29	19:00:00	512	Vessel 2	20.4667	-17.8333	M. polli	D76	MZ703323
D77	M. polli	31.5	J	2020-12-29	19:00:00	512	Vessel 2	20.4667	-17.8333	M. senegalensis	D77	MZ703376
D78	M. polli	31	J	2020-12-29	19:00:00	512	Vessel 2	20.4667	-17.8333	M. senegalensis	D78	MZ703376
D79	M. polli	52	M	2020-12-29	19:00:00	512	Vessel 2	20.4667	-17.8333	M. senegalensis	D79	MZ703376
D80	M. polli	33	J	2020-12-29	19:00:00	512	Vessel 2	20.4667	-17.8333	M. senegalensis	D80	MZ703376
D81	M. polli	32	J	2020-12-29	19:00:00	512	Vessel 2	20.4667	-17.8333	M. senegalensis	D81	MZ703376
E01	M. polli	54	H	2020-02-02	05:30:00	640	Vessel 3	18.3833	-16.6833	M. polli	E01	MZ703321
E02	M. polli	55	H	2020-02-02	05:30:00	640	Vessel 3	18.3833	-16.6833	M. polli	E02	MZ703323
E03	M. polli	35	J	2020-02-02	22:30:00	420	Vessel 3	19.05	-16.85	M. polli	E03	MZ703354
E04	M. senegalensis	32	J	2020-02-02	22:30:00	420	Vessel 3	19.05	-16.85	M. senegalensis	E04	MZ703376
E05	M. senegalensis	39.5	J	2020-02-02	22:30:00	420	Vessel 3	19.05	-16.85	M. senegalensis	E05	MZ703376
E06	M. polli	56	M	2020-02-08	03:00:00	690	Vessel 3	18.0167	-16.65	M. polli	E06	MZ703323
E07	M. polli	57	H	2020-02-08	03:00:00	690	Vessel 3	18.0167	-16.65	M. polli	E07	MZ703321
E08	M. polli	61	H	2020-02-08	03:00:00	690	Vessel 3	18.0167	-16.65	M. polli	E08	MZ703321
E09	M. polli	47.5	H	2020-02-08	03:00:00	690	Vessel 3	18.0167	-16.65	M. polli	E09	MZ703323
E10	M. polli	53	H	2020-02-08	03:00:00	690	Vessel 3	18.0167	-16.65	M. polli	E10	MZ703321
E11	M. polli	60	H	2020-02-08	12:30:00	600	Vessel 3	17.9833	-16.6333	M. polli	E11	MZ703323
E12	M. polli	54	H	2020-02-08	12:30:00	600	Vessel 3	17.9833	-16.6333	M. polli	E12	MZ703321
E13	M. polli	56	H	2020-02-08	12:30:00	600	Vessel 3	17.9833	-16.6333	M. polli	E13	MZ703321
E14	M. polli	54	H	2020-02-08	12:30:00	600	Vessel 3	17.9833	-16.6333	M. polli	E14	MZ703360
E15	M. polli	51	M	2020-02-08	12:30:00	600	Vessel 3	17.9833	-16.6333	M. polli	E15	MZ703360
E16	M. senegalensis	34.5	J	2020-02-09	00:10:00	410	Vessel 3	18	-16.5833	M. senegalensis	E16	MZ703376
E17	M. polli	34	J	2020-02-09	00:10:00	410	Vessel 3	18	-16.5833	M. polli	E17	MZ703360
E18	M. polli	39	J	2020-02-09	00:10:00	410	Vessel 3	18	-16.5833	M. polli	E18	MZ703360
E19	M. polli	36.5	J	2020-02-09	00:10:00	410	Vessel 3	18	-16.5833	M. polli	E19	MZ703360
E20	M. polli	36	J	2020-02-09	00:10:00	410	Vessel 3	18	-16.5833	M. polli	E20	MZ703360
E21	M. polli	36.5	J	2020-02-09	00:10:00	410	Vessel 3	18	-16.5833	M. polli	E21	MZ703355
E22	M. polli	35	J	2020-02-09	00:10:00	410	Vessel 3	18	-16.5833	M. polli	E22	MZ703360
E23	M. polli	39	J	2020-02-09	00:10:00	410	Vessel 3	18	-16.5833	M. polli	E23	MZ703356
E24	M. polli	35	J	2020-02-09	00:10:00	410	Vessel 3	18	-16.5833	M. polli	E24	MZ703355
E25	M. polli	40.5	H	2020-02-09	00:10:00	410	Vessel 3	18	-16.5833	M. polli	E25	MZ703359
E26	M. polli	59	H	2020-02-13	12:00:00	690	Vessel 3	18.0833	-16.6333	M. polli	E26	MZ703356
E27	M. polli	44.5	H	2020-02-13	12:00:00	690	Vessel 3	18.0833	-16.6333	M. polli	E27	MZ703360
E28	M. polli	63	H	2020-02-13	12:00:00	690	Vessel 3	18.0833	-16.6333	M. polli	E28	MZ703357
E29	M. polli	58	H	2020-02-13	12:00:00	690	Vessel 3	18.0833	-16.6333	M. polli	E29	MZ703360
E30	M. polli	42	H	2020-02-13	12:00:00	690	Vessel 3	18.0833	-16.6333	M. polli	E30	MZ703358
E31	M. polli	41	H	2020-02-13	12:00:00	690	Vessel 3	18.0833	-16.6333	M. polli	E31	MZ703359
E32	M. senegalensis	44	M	2020-02-15	13:00:00	570	Vessel 3	18.0667	-16.6167	M. polli	E32	MZ703360
E33	M. senegalensis	56	H	2020-02-15	13:00:00	570	Vessel 3	18.0667	-16.6167	M. senegalensis	E33	MZ703376
E34	M. polli	33.5	J	2020-02-15	13:00:00	570	Vessel 3	18.0667	-16.6167	M. polli	E34	MZ703360
E35	M. polli	34	J	2020-02-15	13:00:00	570	Vessel 3	18.0667	-16.6167	M. polli	E35	MZ703360
E36	M. polli	35	J	2020-02-15	13:00:00	570	Vessel 3	18.0667	-16.6167	M. polli	E36	MZ703360
E37	M. polli	33	J	2020-02-15	13:00:00	570	Vessel 3	18.0667	-16.6167	M. polli	E37	MZ703361
E38	M. senegalensis	54	H	2020-02-17	12:00:00	146	Vessel 3	18.6833	-16.6	M. senegalensis	E38	MZ703376
E39	M. senegalensis	56	H	2020-02-17	12:00:00	146	Vessel 3	18.6833	-16.6	M. senegalensis	E39	MZ703376
E40	M. senegalensis	52	H	2020-02-17	12:00:00	146	Vessel 3	18.6833	-16.6	M. senegalensis	E40	MZ703376
E41	M. senegalensis	59	H	2020-02-17	12:00:00	146	Vessel 3	18.6833	-16.6	M. senegalensis	E41	MZ703376
E42	M. senegalensis	50.5	M	2020-02-17	12:00:00	146	Vessel 3	18.6833	-16.6	M. senegalensis	E42	MZ703376
E43	M. senegalensis	49	H	2020-02-17	12:00:00	146	Vessel 3	18.6833	-16.6	M. polli	E43	MZ703362
E44	M. polli	38	J	2020-02-20	13:00:00	677	Vessel 3	18.0833	-16.6333	M. polli	E44	MZ703321
E45	M. polli	39	J	2020-02-20	13:00:00	677	Vessel 3	18.0833	-16.6333	M. polli	E45	MZ703317
E46	M. polli	39	J	2020-02-20	13:00:00	677	Vessel 3	18.0833	-16.6333	M. polli	E46	MZ703321
E47	M. polli	34	J	2020-02-20	13:00:00	677	Vessel 3	18.0833	-16.6333	M. polli	E47	MZ703321
E48	M. polli	37	J	2020-02-20	13:00:00	677	Vessel 3	18.0833	-16.6333	M. polli	E48	MZ703353
E49	M. polli	34.5	J	2020-02-20	13:00:00	677	Vessel 3	18.0833	-16.6333	M. polli	E49	MZ703321
E50	M. polli	42	J	2020-02-20	13:00:00	677	Vessel 3	18.0833	-16.6333	M. polli	E50	MZ703317
E51	M. polli	39	J	2020-02-20	13:00:00	677	Vessel 3	18.0833	-16.6333	M. polli	E51	MZ703363
E52	M. polli	43	J	2020-02-20	13:00:00	677	Vessel 3	18.0833	-16.6333	M. polli	E52	MZ703363
E53	M. polli	44	H	2020-02-21	00:00:00	695	Vessel 3	18.0333	-16.65	M. polli	E53	MZ703363
E54	M. polli	45	H	2020-02-21	00:00:00	695	Vessel 3	18.0333	-16.65	M. polli	E54	MZ703364
E55	M. polli	43	J	2020-02-21	00:00:00	695	Vessel 3	18.0333	-16.65	M. polli	E55	MZ703321
E56	M. polli	38	J	2020-02-21	00:00:00	695	Vessel 3	18.0333	-16.65	M. polli	E56	MZ703363
E57	M. polli	35	J	2020-02-21	00:00:00	695	Vessel 3	18.0333	-16.65	M. polli	E57	MZ703321
E58	M. polli	38	J	2020-02-21	00:00:00	695	Vessel 3	18.0333	-16.65	M. polli	E58	MZ703363
E59	M. polli	39	J	2020-02-21	00:00:00	695	Vessel 3	18.0333	-16.65	M. polli	E59	MZ703322
E60	M. polli	35.5	J	2020-02-21	00:00:00	695	Vessel 3	18.0333	-16.65	M. polli	E60	MZ703321
E61	M. polli	35	J	2020-02-21	00:00:00	695	Vessel 3	18.0333	-16.65	M. polli	E61	MZ703323
E62	M. polli	40.5	J	2020-02-21	00:00:00	695	Vessel 3	18.0333	-16.65	M. polli	E62	MZ703327
E63	M. polli	32.5	J	2020-03-27	08:00:00	530	Vessel 3	17.7	-16.6833	M. polli	E63	MZ703321
E64	M. polli	35	J	2020-03-27	08:00:00	530	Vessel 3	17.7	-16.6833	M. polli	E64	MZ703335
E65	M. polli	35.5	J	2020-03-27	08:00:00	530	Vessel 3	17.7	-16.6833	M. polli	E65	MZ703336
E66	M. polli	33	J	2020-03-27	08:00:00	530	Vessel 3	17.7	-16.6833	M. polli	E66	MZ703321
E67	M. polli	35	J	2020-03-27	08:00:00	530	Vessel 3	17.7	-16.6833	M. polli	E67	MZ703317
E68	M. polli	35	J	2020-03-27	08:00:00	530	Vessel 3	17.7	-16.6833	M. polli	E68	MZ703321
E69	M. polli	34	J	2020-03-27	08:00:00	530	Vessel 3	17.7	-16.6833	M. polli	E69	MZ703317
E70	M. polli	33	J	2020-03-27	08:00:00	530	Vessel 3	17.7	-16.6833	M. polli	E70	MZ703321
E71	M. polli	33.5	J	2020-03-27	08:00:00	530	Vessel 3	17.7	-16.6833	M. polli	E71	MZ703321
E72	M. polli	33.5	J	2020-03-27	08:00:00	530	Vessel 3	17.7	-16.6833	M. polli	E72	MZ703323
E73	M. senegalensis	47	M	2020-04-21	17:00:00	585	Vessel 3	18.6667	-16.7833	M. senegalensis	E73	MZ703376
E74	M. senegalensis	52	H	2020-04-21	17:00:00	585	Vessel 3	18.6667	-16.7833	M. senegalensis	E74	MZ703374
E75	M. senegalensis	48.5	H	2020-04-21	17:00:00	585	Vessel 3	18.6667	-16.7833	M. senegalensis	E75	MZ703376
E76	M. senegalensis	46.5	H	2020-04-21	17:00:00	585	Vessel 3	18.6667	-16.7833	M. senegalensis	E76	MZ703376
E77	M. polli	36.5	J	2020-04-21	17:00:00	585	Vessel 3	18.6667	-16.7833	M. polli	E77	MZ703322
E78	M. polli	35	J	2020-04-21	17:00:00	585	Vessel 3	18.6667	-16.7833	M. polli	E78	MZ703321
E79	M. polli	39	J	2020-04-21	17:00:00	585	Vessel 3	18.6667	-16.7833	M. polli	E79	MZ703321
E80	M. polli	35	J	2020-04-21	17:00:00	585	Vessel 3	18.6667	-16.7833	M. polli	E80	MZ703318
E81	M. polli	36.5	J	2020-04-21	17:00:00	585	Vessel 3	18.6667	-16.7833	M. polli	E81	MZ703365
F01	M. senegalensis	33	H	14/03/2020	00h 00mn	420	Vessel 4	15.4667	-17.2	M. senegalensis	F01	MZ703376
F02	M. senegalensis	39	M	14/03/2020	00h 00mn	420	Vessel 4	15.4667	-17.2	M. senegalensis	F02	MZ703376
F03	M. senegalensis	35	M	14/03/2020	00h 00mn	420	Vessel 4	15.4667	-17.2	M. senegalensis	F03	MZ703376
F04	M. senegalensis	39.5	M	14/03/2020	00h 00mn	420	Vessel 4	15.4667	-17.2	M. senegalensis	F04	MZ703376
F05	M. senegalensis	30	H	14/03/2020	00h 00mn	420	Vessel 4	15.4667	-17.2	M. senegalensis	F05	MZ703376
F06	M. senegalensis	40	M	14/03/2020	00h 00mn	420	Vessel 4	15.4667	-17.2	M. senegalensis	F06	MZ703376
F07	M. senegalensis	39	M	14/03/2020	00h 00mn	420	Vessel 4	15.4667	-17.2	M. senegalensis	F07	MZ703376
F08	M. senegalensis	27.5	M	14/03/2020	00h 00mn	420	Vessel 4	15.4667	-17.2	M. senegalensis	F08	MZ703377
F09	M. senegalensis	29.5	M	14/03/2020	00h 00mn	420	Vessel 4	15.4667	-17.2	M. senegalensis	F09	MZ703376
F10	M. senegalensis	34.5	H	14/03/2020	00h 00mn	420	Vessel 4	15.4667	-17.2	M. senegalensis	F10	MZ703376
F11	M. senegalensis	31.5	M	14/03/2020	00h 00mn	420	Vessel 4	15.4667	-17.2	M. senegalensis	F11	MZ703376
F12	M. senegalensis	27	M	14/03/2020	00h 00mn	420	Vessel 4	15.4667	-17.2	M. senegalensis	F12	MZ703374
F13	M. senegalensis	29.5	M	14/03/2020	00h 00mn	420	Vessel 4	15.4667	-17.2	M. senegalensis	F13	MZ703376
F14	M. senegalensis	29	H	14/03/2020	00h 00mn	420	Vessel 4	15.4667	-17.2	M. senegalensis	F14	MZ703376
F15	M. senegalensis	29.5	H	14/03/2020	00h 00mn	420	Vessel 4	15.4667	-17.2	M. senegalensis	F15	MZ703376
F16	M. senegalensis	30	M	14/03/2020	00h 00mn	420	Vessel 4	15.4667	-17.2	M. senegalensis	F16	MZ703376
F17	M. senegalensis	27.5	M	14/03/2020	00h 00mn	420	Vessel 4	15.4667	-17.2	M. senegalensis	F17	MZ703376
F18	M. senegalensis	28	H	14/03/2020	00h 00mn	420	Vessel 4	15.4667	-17.2	M. senegalensis	F18	MZ703376
F19	M. senegalensis	34	H	14/03/2020	00h 00mn	420	Vessel 4	15.4667	-17.2	M. senegalensis	F19	MZ703376
F20	M. polli	31.5	M	14/03/2020	00h 00mn	420	Vessel 4	15.4667	-17.2	M. senegalensis	F20	MZ703374
F21	M. polli	36.5	M	14/03/2020	00h 00mn	420	Vessel 4	15.4667	-17.2	M. senegalensis	F21	MZ703376
F22	M. polli	32	H	14/03/2020	00h 00mn	420	Vessel 4	15.4667	-17.2	M. senegalensis	F22	MZ703378
F23	M. polli	37.5	H	14/03/2020	00h 00mn	420	Vessel 4	15.4667	-17.2	M. senegalensis	F23	MZ703376
F24	M. polli	32	M	14/03/2020	00h 00mn	420	Vessel 4	15.4667	-17.2	M. senegalensis	F24	MZ703374
F25	M. polli	33	M	14/03/2020	00h 00mn	420	Vessel 4	15.4667	-17.2	M. senegalensis	F25	MZ703376
F26	M. senegalensis	35.5	H	17/03/2020	09h45mn	107	Vessel 4	15.8717	-16.945	M. senegalensis	F26	MZ703376
F27	M. senegalensis	36.5	H	17/03/2020	09h45mn	107	Vessel 4	15.8717	-16.945	M. senegalensis	F27	MZ703376
F28	M. senegalensis	38.5	M	17/03/2020	09h45mn	107	Vessel 4	15.8717	-16.945	M. senegalensis	F28	MZ703376
F29	M. senegalensis	28.5	M	17/03/2020	09h45mn	107	Vessel 4	15.8717	-16.945	M. senegalensis	F29	MZ703376
F30	M. senegalensis	31.5	M	17/03/2020	09h45mn	107	Vessel 4	15.8717	-16.945	M. senegalensis	F30	MZ703376
F31	M. senegalensis	28	M	17/03/2020	09h45mn	107	Vessel 4	15.8717	-16.945	M. senegalensis	F31	MZ703376
F32	M. senegalensis	33.5	H	17/03/2020	09h45mn	107	Vessel 4	15.8717	-16.945	M. senegalensis	F32	MZ703376
F33	M. senegalensis	31.5	H	17/03/2020	09h45mn	107	Vessel 4	15.8717	-16.945	M. senegalensis	F33	MZ703376
F34	M. senegalensis	25.5	H	17/03/2020	09h45mn	107	Vessel 4	15.8717	-16.945	M. senegalensis	F34	MZ703376
F35	M. senegalensis	32.5	H	17/03/2020	09h45mn	107	Vessel 4	15.8717	-16.945	M. senegalensis	F35	MZ703387
F36	M. senegalensis	33	M	17/03/2020	09h45mn	107	Vessel 4	15.8717	-16.945	M. senegalensis	F36	MZ703376
F37	M. senegalensis	29.5	H	17/03/2020	09h45mn	107	Vessel 4	15.8717	-16.945	M. senegalensis	F37	MZ703376
F38	M. senegalensis	28	H	17/03/2020	09h45mn	107	Vessel 4	15.8717	-16.945	M. senegalensis	F38	MZ703376
F39	M. senegalensis	26.5	H	17/03/2020	09h45mn	107	Vessel 4	15.8717	-16.945	M. senegalensis	F39	MZ703376
F40	M. senegalensis	31.5	M	17/03/2020	09h45mn	107	Vessel 4	15.8717	-16.945	M. senegalensis	F40	MZ703376
F41	M. senegalensis	33.5	M	17/03/2020	09h45mn	107	Vessel 4	15.8717	-16.945	M. senegalensis	F41	MZ703376
F42	M. senegalensis	32	H	17/03/2020	09h45mn	107	Vessel 4	15.8717	-16.945	M. senegalensis	F42	MZ703376
F43	M. senegalensis	26.5	H	17/03/2020	09h45mn	107	Vessel 4	15.8717	-16.945	M. senegalensis	F43	MZ703376
F44	M. senegalensis	31	M	17/03/2020	09h45mn	107	Vessel 4	15.8717	-16.945	M. senegalensis	F44	MZ703376
F45	M. senegalensis	28.5	M	17/03/2020	09h45mn	107	Vessel 4	15.8717	-16.945	M. senegalensis	F45	MZ703376
F46	M. senegalensis	37	H	17/03/2020	09h45mn	107	Vessel 4	15.8717	-16.945	M. senegalensis	F46	MZ703376
F47	M. senegalensis	32	H	17/03/2020	09h45mn	107	Vessel 4	15.8717	-16.945	M. senegalensis	F47	MZ703398
F48	M. polli	29	M	17/03/2020	09h45mn	107	Vessel 4	15.8717	-16.945	M. senegalensis	F48	MZ703376
F49	M. polli	33.5	M	17/03/2020	09h45mn	107	Vessel 4	15.8717	-16.945	M. senegalensis	F49	MZ703376
F50	M. polli	30.5	H	17/03/2020	09h45mn	107	Vessel 4	15.8717	-16.945	M. senegalensis	F50	MZ703376
F51	M. senegalensis	37	M	2020-03-08	00:00:00	520	Vessel 4	15.4583	-17.225	M. polli	F51	MZ703321
F52	M. senegalensis	40	M	2020-03-08	00:00:00	520	Vessel 4	15.4583	-17.225	M. polli	F52	MZ703321
F53	M. senegalensis	38	H	2020-03-08	00:00:00	520	Vessel 4	15.4583	-17.225	M. polli	F53	MZ703323
F54	M. senegalensis	41.5	M	2020-03-08	00:00:00	520	Vessel 4	15.4583	-17.225	M. polli	F54	MZ703321
F55	M. senegalensis	35.5	H	2020-03-08	00:00:00	520	Vessel 4	15.4583	-17.225	M. polli	F55	MZ703321
F56	M. senegalensis	34	M	2020-03-08	00:00:00	520	Vessel 4	15.4583	-17.225	M. polli	F56	MZ703325
F57	M. senegalensis	36	M	2020-03-08	00:00:00	520	Vessel 4	15.4583	-17.225	M. polli	F57	MZ703321
F58	M. senegalensis	40	M	2020-03-08	00:00:00	520	Vessel 4	15.4583	-17.225	M. polli	F58	MZ703327
F59	M. senegalensis	37.5	M	2020-03-08	00:00:00	520	Vessel 4	15.4583	-17.225	M. polli	F59	MZ703327
F60	M. senegalensis	34	M	2020-03-08	00:00:00	520	Vessel 4	15.4583	-17.225	M. polli	F60	MZ703353
F61	M. senegalensis	37	H	2020-03-08	00:00:00	520	Vessel 4	15.4583	-17.225	M. polli	F61	MZ703323
F62	M. senegalensis	39	M	2020-03-08	00:00:00	520	Vessel 4	15.4583	-17.225	M. polli	F62	MZ703321
F63	M. senegalensis	34	M	2020-03-08	00:00:00	520	Vessel 4	15.4583	-17.225	M. polli	F63	MZ703321
F64	M. senegalensis	35	M	2020-03-08	00:00:00	520	Vessel 4	15.4583	-17.225	M. polli	F64	MZ703321
F65	M. senegalensis	36.5	H	2020-03-08	00:00:00	520	Vessel 4	15.4583	-17.225	M. polli	F65	MZ703321
F66	M. senegalensis	33	M	2020-03-08	00:00:00	520	Vessel 4	15.4583	-17.225	M. polli	F66	MZ703321
F67	M. polli	38.5	M	2020-03-08	00:00:00	520	Vessel 4	15.4583	-17.225	M. polli	F67	MZ703323
F68	M. polli	34.5	M	2020-03-08	00:00:00	520	Vessel 4	15.4583	-17.225	M. polli	F68	MZ703372
F69	M. polli	34.5	M	2020-08-03	00h 00mn	520	Vessel 4	15.4583	-17.225	M. senegalensis	F69	MZ703387
F70	M. polli	34	H	2020-03-08	00:00:00	520	Vessel 4	15.4583	-17.225	M. polli	F70	MZ703321
F71	M. polli	37	H	2020-03-08	00:00:00	520	Vessel 4	15.4583	-17.225	M. polli	F71	MZ703321
F72	M. polli	33.5	M	2020-03-08	00:00:00	520	Vessel 4	15.4583	-17.225	M. polli	F72	MZ703317
F73	M. polli	34.5	M	2020-03-08	00:00:00	520	Vessel 4	15.4583	-17.225	M. polli	F73	MZ703321
F74	M. polli	34.5	M	2020-03-08	00:00:00	520	Vessel 4	15.4583	-17.225	M. polli	F74	MZ703317
F75	M. polli	36.5	M	2020-03-08	00:00:00	520	Vessel 4	15.4583	-17.225	M. polli	F75	MZ703323
F76	M. senegalensis	34.5	H	2020-09-03	20h20mn	540	Vessel 4	15.635	-17.1333	M. senegalensis	F76	MZ703376
F77	M. senegalensis	35.5	M	2020-03-09	20:20:00	540	Vessel 4	15.635	-17.1333	M. polli	F77	MZ703321
F78	M. senegalensis	34.5	M	2020-03-09	20:20:00	540	Vessel 4	15.635	-17.1333	M. polli	F78	MZ703366
F79	M. polli	37.5	M	2020-09-03	20h20mn	540	Vessel 4	15.635	-17.1333	M. senegalensis	F79	MZ703376
F80	M. polli	35.5	H	2020-09-03	20h20mn	540	Vessel 4	15.635	-17.1333	M. senegalensis	F80	MZ703374
F81	M. polli	34	H	2020-09-03	20h20mn	540	Vessel 4	15.635	-17.1333	M. senegalensis	F81	MZ703376
G01	M. senegalensis	37	M	2020-03-09	20:20:00	540	Vessel 4	15.635	-17.1333	M. polli	G01	MZ703321
G02	M. senegalensis	35	M	2020-03-09	20:20:00	540	Vessel 4	15.635	-17.1333	M. polli	G02	MZ703321
G03	M. senegalensis	33.5	H	2020-09-03	20h20mn	540	Vessel 4	15.635	-17.1333	M. senegalensis	G03	MZ703376
G04	M. senegalensis	35	H	2020-03-09	20:20:00	540	Vessel 4	15.635	-17.1333	M. polli	G04	MZ703321
G05	M. senegalensis	37	M	2020-03-09	20:20:00	540	Vessel 4	15.635	-17.1333	M. polli	G05	MZ703321
G06	M. senegalensis	34	H	2020-09-03	20h20mn	540	Vessel 4	15.635	-17.1333	M. senegalensis	G06	MZ703376
G07	M. senegalensis	40	H	2020-03-09	20:20:00	540	Vessel 4	15.635	-17.1333	M. polli	G07	MZ703321
G08	M. senegalensis	35.5	M	2020-03-09	20:20:00	540	Vessel 4	15.635	-17.1333	M. polli	G08	MZ703323
G09	M. senegalensis	32.5	H	2020-09-03	20h20mn	540	Vessel 4	15.635	-17.1333	M. senegalensis	G09	MZ703376
G10	M. senegalensis	36.5	H	2020-09-03	20h20mn	540	Vessel 4	15.635	-17.1333	M. senegalensis	G10	MZ703376
G11	M. senegalensis	37	M	2020-03-09	20:20:00	540	Vessel 4	15.635	-17.1333	M. polli	G11	MZ703321
G12	M. senegalensis	38.5	H	2020-03-09	20:20:00	540	Vessel 4	15.635	-17.1333	M. polli	G12	MZ703367
G13	M. senegalensis	37	M	2020-03-09	20:20:00	540	Vessel 4	15.635	-17.1333	M. polli	G13	MZ703368
G14	M. senegalensis	37	H	2020-03-09	20:20:00	540	Vessel 4	15.635	-17.1333	M. polli	G14	MZ703363
G15	M. polli	36.5	M	2020-03-09	20:20:00	540	Vessel 4	15.635	-17.1333	M. polli	G15	MZ703369
G16	M. polli	39.5	M	2020-03-09	20:20:00	540	Vessel 4	15.635	-17.1333	M. polli	G16	MZ703318
G17	M. polli	37	M	2020-03-09	20:20:00	540	Vessel 4	15.635	-17.1333	M. polli	G17	MZ703370
G18	M. polli	33.5	H	2020-09-03	20h20mn	540	Vessel 4	15.635	-17.1333	M. senegalensis	G18	MZ703376
G19	M. polli	35	H	2020-03-09	20:20:00	540	Vessel 4	15.635	-17.1333	M. polli	G19	MZ703369
G20	M. senegalensis	34	H	2020-03-11	05:00:00	410	Vessel 4	15.46	-17.225	M. polli	G20	MZ703323
G21	M. senegalensis	33	H	2020-11-03	05h00mn	410	Vessel 4	15.46	-17.225	M. senegalensis	G21	MZ703376
G22	M. senegalensis	30	H	2020-03-11	05:00:00	410	Vessel 4	15.46	-17.225	M. polli	G22	MZ703322
G23	M. senegalensis	34	M	2020-03-11	05:00:00	410	Vessel 4	15.46	-17.225	M. polli	G23	MZ703321
G24	M. senegalensis	29	H	2020-03-11	05:00:00	410	Vessel 4	15.46	-17.225	M. polli	G24	MZ703323
G25	M. senegalensis	34	H	2020-03-11	05:00:00	410	Vessel 4	15.46	-17.225	M. polli	G25	MZ703323
G26	M. senegalensis	32.5	H	2020-11-03	05h00mn	410	Vessel 4	15.46	-17.225	M. senegalensis	G26	MZ703376
G27	M. senegalensis	32.5	M	2020-03-11	05:00:00	410	Vessel 4	15.46	-17.225	M. polli	G27	MZ703353
G28	M. senegalensis	27	H	2020-03-11	05:00:00	410	Vessel 4	15.46	-17.225	M. polli	G28	MZ703371
G29	M. senegalensis	38.5	H	2020-03-11	05:00:00	410	Vessel 4	15.46	-17.225	M. polli	G29	MZ703321
G30	M. senegalensis	29.5	M	2020-03-11	05:00:00	410	Vessel 4	15.46	-17.225	M. polli	G30	MZ703321
G31	M. senegalensis	37.5	M	2020-03-11	05:00:00	410	Vessel 4	15.46	-17.225	M. polli	G31	MZ703322
G32	M. senegalensis	37.5	M	2020-03-11	05:00:00	410	Vessel 4	15.46	-17.225	M. polli	G32	MZ703321
G33	M. polli	27.5	H	2020-03-11	05:00:00	410	Vessel 4	15.46	-17.225	M. polli	G33	MZ703322
G34	M. polli	30	H	2020-03-11	05:00:00	410	Vessel 4	15.46	-17.225	M. polli	G34	MZ703353
G35	M. polli	34	M	2020-11-03	05h00mn	410	Vessel 4	15.46	-17.225	M. senegalensis	G35	MZ703376
G36	M. polli	29	M	2020-03-11	05:00:00	410	Vessel 4	15.46	-17.225	M. polli	G36	MZ703323
G37	M. polli	32.5	H	2020-11-03	05h00mn	410	Vessel 4	15.46	-17.225	M. senegalensis	G37	MZ703376
G38	M. polli	28	M	2020-03-11	05:00:00	410	Vessel 4	15.46	-17.225	M. polli	G38	MZ703321
G39	M. polli	33.5	M	2020-03-11	05:00:00	410	Vessel 4	15.46	-17.225	M. polli	G39	MZ703353
G40	M. polli	34.5	H	2020-03-11	05:00:00	410	Vessel 4	15.46	-17.225	M. polli	G40	MZ703321
G41	M. polli	28	H	2020-03-11	05:00:00	410	Vessel 4	15.46	-17.225	M. polli	G41	MZ703321
G42	M. polli	28.5	M	2020-03-11	05:00:00	410	Vessel 4	15.46	-17.225	M. polli	G42	MZ703321
G43	M. polli	35.5	M	2020-03-11	05:00:00	410	Vessel 4	15.46	-17.225	M. polli	G43	MZ703321
G44	M. polli	44	H	2020-03-11	05:00:00	410	Vessel 4	15.46	-17.225	M. polli	G44	MZ703372
G45	M. senegalensis	37.5	M	2020-03-12	23:20:00	249	Vessel 4	15.4567	-17.2133	M. polli	G45	MZ703337
G46	M. senegalensis	33.5	H	2020-12-03	23h20mn	249	Vessel 4	15.4567	-17.2133	M. senegalensis	G46	MZ703376
G47	M. senegalensis	32.5	M	2020-03-12	23:20:00	249	Vessel 4	15.4567	-17.2133	M. polli	G47	MZ703323
G48	M. senegalensis	30.5	H	2020-12-03	23h20mn	249	Vessel 4	15.4567	-17.2133	M. senegalensis	G48	MZ703376
G49	M. senegalensis	31.5	M	2020-12-03	23h20mn	249	Vessel 4	15.4567	-17.2133	M. senegalensis	G49	MZ703374
G50	M. senegalensis	34.5	H	2020-12-03	23h20mn	249	Vessel 4	15.4567	-17.2133	M. senegalensis	G50	MZ703376
G51	M. senegalensis	27	M	2020-03-12	23:20:00	249	Vessel 4	15.4567	-17.2133	M. polli	G51	MZ703329
G52	M. senegalensis	33.5	H	2020-03-12	23:20:00	249	Vessel 4	15.4567	-17.2133	M. polli	G52	MZ703321
G53	M. senegalensis	33.5	M	2020-03-12	23:20:00	249	Vessel 4	15.4567	-17.2133	M. polli	G53	MZ703353
G54	M. senegalensis	32.5	M	2020-12-03	23h20mn	249	Vessel 4	15.4567	-17.2133	M. senegalensis	G54	MZ703376
G55	M. senegalensis	35.5	M	2020-12-03	23h20mn	249	Vessel 4	15.4567	-17.2133	M. senegalensis	G55	MZ703376
G56	M. senegalensis	34	M	2020-03-12	23:20:00	249	Vessel 4	15.4567	-17.2133	M. polli	G56	MZ703323
G57	M. senegalensis	32.5	M	2020-03-12	23:20:00	249	Vessel 4	15.4567	-17.2133	M. polli	G57	MZ703323
G58	M. polli	31	M	2020-03-12	23:20:00	249	Vessel 4	15.4567	-17.2133	M. polli	G58	MZ703317
G59	M. polli	25	H	2020-03-12	23:20:00	249	Vessel 4	15.4567	-17.2133	M. polli	G59	MZ703321
G60	M. polli	31	M	2020-12-03	23h20mn	249	Vessel 4	15.4567	-17.2133	M. senegalensis	G60	MZ703376
G61	M. polli	30.5	M	2020-03-12	23:20:00	249	Vessel 4	15.4567	-17.2133	M. polli	G61	MZ703321
G62	M. polli	31	M	2020-12-03	23h20mn	249	Vessel 4	15.4567	-17.2133	M. senegalensis	G62	MZ703376
G63	M. polli	37	M	2020-03-12	23:20:00	249	Vessel 4	15.4567	-17.2133	M. polli	G63	MZ703323
G64	M. polli	36.5	M	2020-03-12	23:20:00	249	Vessel 4	15.4567	-17.2133	M. polli	G64	MZ703373
G65	M. polli	30.5	H	2020-03-12	23:20:00	249	Vessel 4	15.4567	-17.2133	M. polli	G65	MZ703353
G66	M. polli	32.5	H	2020-12-03	23h20mn	249	Vessel 4	15.4567	-17.2133	M. senegalensis	G66	MZ703376
G67	M. polli	33.5	H	2020-12-03	23h20mn	249	Vessel 4	15.4567	-17.2133	M. senegalensis	G67	MZ703376
G68	M. polli	32.5	H	2020-12-03	23h20mn	249	Vessel 4	15.4567	-17.2133	M. senegalensis	G68	MZ703376
G69	M. polli	31.5	H	2020-12-03	23h20mn	249	Vessel 4	15.4567	-17.2133	M. senegalensis	G69	MZ703376
G70	M. senegalensis	37	H	2020-08-03	00h 00mn	286	Vessel 4	15.4583	-17.225	M. senegalensis	G70	MZ703376
G71	M. senegalensis	36	M	2020-03-08	00:00:00	286	Vessel 4	15.4583	-17.225	M. polli	G71	MZ703321
G72	M. senegalensis	35.5	M	2020-03-08	00:00:00	286	Vessel 4	15.4583	-17.225	M. polli	G72	MZ703322
G73	M. senegalensis	35	H	2020-08-03	00h 00mn	286	Vessel 4	15.4583	-17.225	M. senegalensis	G73	MZ703376
G74	M. senegalensis	39.5	M	2020-03-08	00:00:00	286	Vessel 4	15.4583	-17.225	M. polli	G74	MZ703321
G75	M. senegalensis	34.5	M	2020-03-08	00:00:00	286	Vessel 4	15.4583	-17.225	M. polli	G75	MZ703321
G76	M. senegalensis	38	H	2020-03-08	00:00:00	286	Vessel 4	15.4583	-17.225	M. polli	G76	MZ703321
G77	M. senegalensis	35	M	2020-03-08	00:00:00	286	Vessel 4	15.4583	-17.225	M. polli	G77	MZ703317
G78	M. senegalensis	40.5	M	2020-08-03	00h 00mn	286	Vessel 4	15.4583	-17.225	M. senegalensis	G78	MZ703376
G79	M. polli	37	M	2020-03-08	00:00:00	286	Vessel 4	15.4583	-17.225	M. polli	G79	MZ703338
G80	M. polli	38	H	2020-03-08	00:00:00	286	Vessel 4	15.4583	-17.225	M. polli	G80	MZ703323
G81	M. polli	37	H	2020-08-03	00h 00mn	286	Vessel 4	15.4583	-17.225	M. senegalensis	G81	MZ703376
H01	M. senegalensis	55.5	H	2020-09-03	17H00	300	Artisanal Vessel	14.9552	-17.3692	M. senegalensis	H01	MZ703376
H02	M. senegalensis	56	H	2020-09-06	17H00	300	Artisanal Vessel	14.9552	-17.3692	M. senegalensis	H02	MZ703376
H03	M. senegalensis	51	H	2020-09-06	17H00	300	Artisanal Vessel	14.9552	-17.3692	M. senegalensis	H03	MZ703376
H04	M. senegalensis	39	H	2020-09-06	17H00	300	Artisanal Vessel	14.9552	-17.3692	M. senegalensis	H04	MZ703376
H05	M. senegalensis	53.5	H	2020-09-06	17H00	300	Artisanal Vessel	14.9552	-17.3692	M. senegalensis	H05	MZ703376
H06	M. senegalensis	37.5	H	2020-09-06	17H00	300	Artisanal Vessel	14.9552	-17.3692	M. senegalensis	H06	MZ703376
H07	M. senegalensis	57	H	2020-09-06	17H00	300	Artisanal Vessel	14.9552	-17.3692	M. senegalensis	H07	MZ703376
H08	M. senegalensis	58.5	H	2020-09-06	17H00	300	Artisanal Vessel	14.9552	-17.3692	M. senegalensis	H08	MZ703376
H09	M. senegalensis	52	H	2020-09-06	17H00	300	Artisanal Vessel	14.9552	-17.3692	M. senegalensis	H09	MZ703376
H10	M. senegalensis	53	H	2020-09-06	17H00	300	Artisanal Vessel	14.9552	-17.3692	M. senegalensis	H10	MZ703376
H100	M. polli	53.5	H	2020-09-06	16H45	300	Artisanal Vessel	14.9643	-17.376	M. senegalensis	H100	MZ703376
H11	M. senegalensis	52	H	2020-09-06	17H00	300	Artisanal Vessel	14.9552	-17.3692	M. senegalensis	H11	MZ703376
H12	M. senegalensis	52.5	H	2020-09-06	17H00	300	Artisanal Vessel	14.9552	-17.3692	M. senegalensis	H12	MZ703391
H13	M. senegalensis	48	H	2020-09-06	17H00	300	Artisanal Vessel	14.9552	-17.3692	M. senegalensis	H13	MZ703391
H14	M. senegalensis	52.5	H	2020-09-06	17H00	300	Artisanal Vessel	14.9552	-17.3692	M. senegalensis	H14	MZ703391
H15	M. senegalensis	64.5	H	2020-09-06	17H00	300	Artisanal Vessel	14.9552	-17.3692	M. senegalensis	H15	MZ703391
H16	M. senegalensis	44.5	M	2020-09-06	17H00	300	Artisanal Vessel	14.9552	-17.3692	M. senegalensis	H16	MZ703391
H17	M. senegalensis	57	H	2020-09-06	17H00	300	Artisanal Vessel	14.9552	-17.3692	M. senegalensis	H17	MZ703376
H18	M. senegalensis	53	H	2020-09-06	17H00	300	Artisanal Vessel	14.9552	-17.3692	M. senegalensis	H18	MZ703388
H19	M. senegalensis	53	H	2020-09-06	17H00	300	Artisanal Vessel	14.9552	-17.3692	M. senegalensis	H19	MZ703389
H20	M. senegalensis	52.5	H	2020-09-06	17H00	300	Artisanal Vessel	14.9552	-17.3692	M. senegalensis	H20	MZ703391
H21	M. polli	35	H	2020-09-06	17H00	300	Artisanal Vessel	14.9552	-17.3692	M. senegalensis	H21	MZ703391
H22	M. polli	52.5	H	2020-09-06	17H00	300	Artisanal Vessel	14.9552	-17.3692	M. senegalensis	H22	MZ703390
H23	M. polli	52	H	2020-09-06	17H00	300	Artisanal Vessel	14.9552	-17.3692	M. senegalensis	H23	MZ703391
H24	M. polli	55	H	2020-09-06	17H00	300	Artisanal Vessel	14.9552	-17.3692	M. senegalensis	H24	MZ703391
H25	M. polli	50	H	2020-09-06	17H00	300	Artisanal Vessel	14.9552	-17.3692	M. senegalensis	H25	MZ703391
H26	M. polli	50	H	2020-09-06	17H00	300	Artisanal Vessel	14.9552	-17.3692	M. senegalensis	H26	MZ703391
H27	M. polli	52	H	2020-09-06	17H00	300	Artisanal Vessel	14.9552	-17.3692	M. senegalensis	H27	MZ703391
H28	M. polli	50	H	2020-09-06	17H00	300	Artisanal Vessel	14.9552	-17.3692	M. senegalensis	H28	MZ703391
H29	M. polli	33	H	2020-09-06	17H00	300	Artisanal Vessel	14.9552	-17.3692	M. senegalensis	H29	MZ703391
H30	M. polli	51	H	2020-09-06	17H00	300	Artisanal Vessel	14.9552	-17.3692	M. senegalensis	H30	MZ703391
H31	M. polli	51	H	2020-09-06	17H00	300	Artisanal Vessel	14.9552	-17.3692	M. senegalensis	H31	MZ703391
H32	M. polli	56.5	H	2020-09-06	17H00	300	Artisanal Vessel	14.9552	-17.3692	M. senegalensis	H32	MZ703376
H33	M. polli	52.5	H	2020-09-06	17H00	300	Artisanal Vessel	14.9552	-17.3692	M. senegalensis	H33	MZ703376
H34	M. polli	55.5	H	2020-09-06	16H30	250	Artisanal Vessel	15.0114	-17.3323	M. senegalensis	H34	MZ703376
H44	M. polli	51.5	H	2020-09-06	16H30	250	Artisanal Vessel	15.0114	-17.3323	M. senegalensis	H44	MZ703376
H45	M. polli	63.5	H	2020-09-06	16H30	250	Artisanal Vessel	15.0114	-17.3323	M. senegalensis	H45	MZ703374
H46	M. polli	37.5	H	2020-09-06	16H30	250	Artisanal Vessel	15.0114	-17.3323	M. senegalensis	H46	MZ703376
H47	M. polli	50.5	H	2020-09-06	16H30	250	Artisanal Vessel	15.0114	-17.3323	M. senegalensis	H47	MZ703374
H48	M. polli	59	H	2020-09-06	16H30	250	Artisanal Vessel	15.0114	-17.3323	M. senegalensis	H48	MZ703376
H49	M. polli	52.5	H	2020-09-06	16H30	250	Artisanal Vessel	15.0114	-17.3323	M. senegalensis	H49	MZ703376
H50	M. polli	61	H	2020-09-06	16H30	250	Artisanal Vessel	15.0114	-17.3323	M. senegalensis	H50	MZ703376
H51	M. senegalensis	49.5	H	2020-09-06	16H30	250	Artisanal Vessel	15.0114	-17.3323	M. senegalensis	H51	MZ703376
H52	M. senegalensis	47.5	H	2020-09-06	16H30	250	Artisanal Vessel	15.0114	-17.3323	M. senegalensis	H52	MZ703376
H53	M. senegalensis	51	H	2020-09-06	16H30	250	Artisanal Vessel	15.0114	-17.3323	M. senegalensis	H53	MZ703376
H54	M. senegalensis	55	H	2020-09-06	16H30	250	Artisanal Vessel	15.0114	-17.3323	M. senegalensis	H54	MZ703376
H55	M. senegalensis	50	H	2020-09-06	16H30	250	Artisanal Vessel	15.0114	-17.3323	M. senegalensis	H55	MZ703376
H56	M. senegalensis	49.5	H	2020-09-06	16H30	250	Artisanal Vessel	15.0114	-17.3323	M. senegalensis	H56	MZ703376
H57	M. senegalensis	61.5	H	2020-09-06	16H30	250	Artisanal Vessel	15.0114	-17.3323	M. senegalensis	H57	MZ703376
H58	M. senegalensis	50.5	H	2020-09-06	16H30	250	Artisanal Vessel	15.0114	-17.3323	M. senegalensis	H58	MZ703387
H59	M. senegalensis	57	H	2020-09-06	16H30	250	Artisanal Vessel	15.0114	-17.3323	M. senegalensis	H59	MZ703379
H60	M. senegalensis	49	H	2020-09-06	16H30	250	Artisanal Vessel	15.0114	-17.3323	M. senegalensis	H60	MZ703391
H61	M. senegalensis	56	H	2020-09-06	16H30	250	Artisanal Vessel	15.0114	-17.3323	M. senegalensis	H61	MZ703388
H62	M. senegalensis	51.5	H	2020-09-06	16H30	250	Artisanal Vessel	15.0114	-17.3323	M. senegalensis	H62	MZ703388
H63	M. senegalensis	53.5	H	2020-09-06	16H30	250	Artisanal Vessel	15.0114	-17.3323	M. senegalensis	H63	MZ703391
H64	M. senegalensis	55	H	2020-09-06	16H30	250	Artisanal Vessel	15.0114	-17.3323	M. senegalensis	H64	MZ703391
H65	M. senegalensis	55	H	2020-09-06	16H30	251	Artisanal Vessel	15.0114	-17.3323	M. senegalensis	H65	MZ703376
H66	M. senegalensis	48.5	H	2020-09-06	16H30	252	Artisanal Vessel	15.0114	-17.3324	M. senegalensis	H66	MZ703376
H67	M. senegalensis	56	H	2020-09-06	16H30	253	Artisanal Vessel	15.0114	-17.3324	M. senegalensis	H67	MZ703374
H68	M. senegalensis	54	H	2020-09-06	16H30	254	Artisanal Vessel	15.0114	-17.3324	M. senegalensis	H68	MZ703376
H69	M. senegalensis	60	H	2020-09-06	16H45	300	Artisanal Vessel	14.9643	-17.376	M. senegalensis	H69	MZ703376
H70	M. senegalensis	51.5	H	2020-09-06	16H45	300	Artisanal Vessel	14.9643	-17.376	M. senegalensis	H70	MZ703400
H71	M. senegalensis	59	H	2020-09-06	16H45	300	Artisanal Vessel	14.9643	-17.376	M. senegalensis	H71	MZ703376
H72	M. senegalensis	53	H	2020-09-06	16H45	300	Artisanal Vessel	14.9643	-17.376	M. senegalensis	H72	MZ703400
H73	M. senegalensis	60	H	2020-09-06	16H45	300	Artisanal Vessel	14.9643	-17.376	M. senegalensis	H73	MZ703392
H74	M. senegalensis	60	H	2020-09-06	16H45	300	Artisanal Vessel	14.9643	-17.376	M. senegalensis	H74	MZ703393
H75	M. senegalensis	60.5	H	2020-09-06	16H45	300	Artisanal Vessel	14.9643	-17.376	M. senegalensis	H75	MZ703393
H76	M. senegalensis	60	H	2020-09-06	16H45	300	Artisanal Vessel	14.9643	-17.376	M. senegalensis	H76	MZ703376
H77	M. senegalensis	52	H	2020-09-06	16H45	300	Artisanal Vessel	14.9643	-17.376	M. senegalensis	H77	MZ703376
H78	M. senegalensis	54.5	H	2020-09-06	16H45	300	Artisanal Vessel	14.9643	-17.376	M. senegalensis	H78	MZ703376
H79	M. senegalensis	61	H	2020-09-06	16H45	300	Artisanal Vessel	14.9643	-17.376	M. senegalensis	H79	MZ703376
H80	M. senegalensis	50	H	2020-09-06	16H45	300	Artisanal Vessel	14.9643	-17.376	M. senegalensis	H80	MZ703374
H81	M. senegalensis	57.5	H	2020-09-06	16H45	300	Artisanal Vessel	14.9643	-17.376	M. senegalensis	H81	MZ703387
H82	M. senegalensis	53.5	H	2020-09-06	16H45	300	Artisanal Vessel	14.9643	-17.376	M. senegalensis	H82	MZ703376
H83	M. senegalensis	52	H	2020-09-06	16H45	300	Artisanal Vessel	14.9643	-17.376	M. senegalensis	H83	MZ703376
H84	M. senegalensis	49	H	2020-09-06	16H45	300	Artisanal Vessel	14.9643	-17.376	M. senegalensis	H84	MZ703376
H85	M. senegalensis	52.5	H	2020-09-06	16H45	300	Artisanal Vessel	14.9643	-17.376	M. senegalensis	H85	MZ703376
H86	M. senegalensis	56	H	2020-09-06	16H45	300	Artisanal Vessel	14.9643	-17.376	M. senegalensis	H86	MZ703376
H87	M. polli	63.5	H	2020-09-06	16H45	300	Artisanal Vessel	14.9643	-17.376	M. senegalensis	H87	MZ703406
H88	M. polli	55	H	2020-09-06	16H45	300	Artisanal Vessel	14.9643	-17.376	M. senegalensis	H88	MZ703376
H89	M. polli	48.5	H	2020-09-06	16H45	300	Artisanal Vessel	14.9643	-17.376	M. senegalensis	H89	MZ703376
H90	M. polli	48.5	H	2020-09-06	16H45	300	Artisanal Vessel	14.9643	-17.376	M. senegalensis	H90	MZ703376
H91	M. polli	49.5	M	2020-09-06	16H45	300	Artisanal Vessel	14.9643	-17.376	M. senegalensis	H91	MZ703376
H92	M. polli	52.5	H	2020-09-06	16H45	300	Artisanal Vessel	14.9643	-17.376	M. senegalensis	H92	MZ703376
H93	M. polli	54	H	2020-09-06	16H45	300	Artisanal Vessel	14.9643	-17.376	M. senegalensis	H93	MZ703376
H94	M. polli	38.5	H	2020-09-06	16H45	300	Artisanal Vessel	14.9643	-17.376	M. senegalensis	H94	MZ703376
H95	M. polli	50	H	2020-09-06	16H45	300	Artisanal Vessel	14.9643	-17.376	M. senegalensis	H95	MZ703380
H96	M. polli	48	H	2020-09-06	16H45	300	Artisanal Vessel	14.9643	-17.376	M. senegalensis	H96	MZ703376
H97	M. polli	53	H	2020-09-06	16H45	300	Artisanal Vessel	14.9643	-17.376	M. senegalensis	H97	MZ703376
H98	M. polli	36	H	2020-09-06	16H45	300	Artisanal Vessel	14.9643	-17.376	M. senegalensis	H98	MZ703376
H99	M. polli	56.5	H	2020-09-06	16H45	300	Artisanal Vessel	14.9643	-17.376	M. senegalensis	H99	MZ703376
I01	M. senegalensis	46	H	17/06/2020	17H30	300	Artisanal Vessel	14.9997	-17.317	M. senegalensis	I01	MZ703376
I02	M. senegalensis	53	H	17/06/2020	17H30	300	Artisanal Vessel	14.9997	-17.317	M. senegalensis	i02	MZ703374
I03	M. senegalensis	54.5	H	17/06/2020	17H30	300	Artisanal Vessel	14.9997	-17.317	M. senegalensis	I03	MZ703376
i04	M. senegalensis	53.5	H	17/06/2020	17H30	300	Artisanal Vessel	14.9997	-17.317	M. senegalensis	i04	MZ703376
i05	M. senegalensis	42	H	17/06/2020	17H30	300	Artisanal Vessel	14.9997	-17.317	M. senegalensis	i05	MZ703376
i06	M. senegalensis	54.5	H	17/06/2020	17H30	300	Artisanal Vessel	14.9997	-17.317	M. senegalensis	I06	MZ703376
i07	M. senegalensis	52	H	17/06/2020	17H30	300	Artisanal Vessel	14.9997	-17.317	M. senegalensis	I07	MZ703376
i08	M. senegalensis	52	H	17/06/2020	17H30	300	Artisanal Vessel	14.9997	-17.317	M. senegalensis	I08	MZ703394
i09	M. senegalensis	51	H	17/06/2020	17H30	300	Artisanal Vessel	14.9997	-17.317	M. senegalensis	I09	MZ703376
i10	M. senegalensis	42.5	H	17/06/2020	17H30	300	Artisanal Vessel	14.9997	-17.317	M. senegalensis	I10	MZ703376
i11	M. senegalensis	53.5	H	17/06/2020	17H30	300	Artisanal Vessel	14.9997	-17.317	M. senegalensis	i11	MZ703376
i12	M. senegalensis	50	H	17/06/2020	17H30	300	Artisanal Vessel	14.9997	-17.317	M. senegalensis	I12	MZ703387
i13	M. senegalensis	51	H	17/06/2020	17H30	300	Artisanal Vessel	14.9997	-17.317	M. senegalensis	I13	MZ703376
i14	M. senegalensis	51.5	H	17/06/2020	17H30	300	Artisanal Vessel	14.9997	-17.317	M. senegalensis	I14	MZ703376
i15	M. senegalensis	56.5	H	17/06/2020	17H30	300	Artisanal Vessel	14.9997	-17.317	M. senegalensis	I15	MZ703376
i16	M. senegalensis	56	H	17/06/2020	17H30	300	Artisanal Vessel	14.9997	-17.317	M. senegalensis	i16	MZ703376
i17	M. senegalensis	47	H	17/06/2020	17H30	300	Artisanal Vessel	14.9997	-17.317	M. senegalensis	I17	MZ703374
i18	M. senegalensis	55	H	17/06/2020	17H30	300	Artisanal Vessel	14.9997	-17.317	M. senegalensis	I18	MZ703376
i19	M. senegalensis	42.5	H	17/06/2020	17H30	300	Artisanal Vessel	14.9997	-17.317	M. senegalensis	I19	MZ703376
i20	M. senegalensis	46	H	17/06/2020	17H30	300	Artisanal Vessel	14.9997	-17.317	M. senegalensis	I20	MZ703376
i21	M. senegalensis	48.5	H	17/06/2020	17H30	300	Artisanal Vessel	14.9997	-17.317	M. senegalensis	I21	MZ703376
i22	M. senegalensis	57	H	17/06/2020	17H30	300	Artisanal Vessel	14.9997	-17.317	M. senegalensis	I22	MZ703376
i23	M. senegalensis	59	H	17/06/2020	17H30	300	Artisanal Vessel	14.9997	-17.317	M. senegalensis	I23	MZ703376
i24	M. senegalensis	40	H	17/06/2020	17H30	300	Artisanal Vessel	14.9997	-17.317	M. senegalensis	I24	MZ703376
i25	M. senegalensis	55	H	17/06/2020	17H30	300	Artisanal Vessel	14.9997	-17.317	M. senegalensis	I25	MZ703376
i26	M. senegalensis	50	H	17/06/2020	17H30	300	Artisanal Vessel	14.9997	-17.317	M. senegalensis	I26	MZ703376
i27	M. senegalensis	56.5	H	17/06/2020	17H30	300	Artisanal Vessel	14.9997	-17.317	M. senegalensis	I27	MZ703376
i28	M. senegalensis	52.5	H	17/06/2020	17H30	300	Artisanal Vessel	14.9997	-17.317	M. senegalensis	I28	MZ703376
i29	M. senegalensis	53.5	H	17/06/2020	17H30	300	Artisanal Vessel	14.9997	-17.317	M. senegalensis	I29	MZ703376
i30	M. senegalensis	46.5	M	17/06/2020	17H30	300	Artisanal Vessel	14.9997	-17.317	M. senegalensis	I30	MZ703376
i31	M. senegalensis	49	H	17/06/2020	17H30	300	Artisanal Vessel	14.9997	-17.317	M. senegalensis	I31	MZ703376
i32	M. senegalensis	55.5	H	17/06/2020	17H30	300	Artisanal Vessel	14.9997	-17.317	M. senegalensis	I32	MZ703374
i33	M. senegalensis	46	M	17/06/2020	17H30	300	Artisanal Vessel	14.9997	-17.317	M. senegalensis	I33	MZ703376
i34	M. senegalensis	52	H	17/06/2020	17H30	300	Artisanal Vessel	14.9997	-17.317	M. senegalensis	I34	MZ703376
i35	M. senegalensis	52.5	H	17/06/2020	17H30	300	Artisanal Vessel	14.9997	-17.317	M. senegalensis	I35	MZ703376
i36	M. senegalensis	51	H	17/06/2020	17H30	300	Artisanal Vessel	14.9997	-17.317	M. senegalensis	I36	MZ703387
i37	M. senegalensis	49	H	17/06/2020	17H30	300	Artisanal Vessel	14.9997	-17.317	M. senegalensis	I37	MZ703376
i38	M. senegalensis	43.5	H	17/06/2020	17H30	300	Artisanal Vessel	14.9997	-17.317	M. senegalensis	I38	MZ703376
i39	M. senegalensis	48.5	H	17/06/2020	17H30	300	Artisanal Vessel	14.9997	-17.317	M. senegalensis	I39	MZ703374
i40	M. senegalensis	54.5	H	17/06/2020	17H30	300	Artisanal Vessel	14.9997	-17.317	M. senegalensis	I40	MZ703376
i41	M. senegalensis	50	H	17/06/2020	17H30	300	Artisanal Vessel	14.9997	-17.317	M. senegalensis	I41	MZ703376
i42	M. senegalensis	53.5	H	17/06/2020	17H30	300	Artisanal Vessel	14.9997	-17.317	M. senegalensis	I42	MZ703387
i43	M. senegalensis	43.5	H	17/06/2020	17H30	300	Artisanal Vessel	14.9997	-17.317	M. senegalensis	I43	MZ703376
i44	M. senegalensis	58	H	17/06/2020	17H30	300	Artisanal Vessel	14.9997	-17.317	M. senegalensis	I44	MZ703376
i45	M. senegalensis	52.5	H	17/06/2020	17H30	300	Artisanal Vessel	14.9997	-17.317	M. senegalensis	I45	MZ703376
i47	M. senegalensis	52.5	H	17/06/2020	17H30	300	Artisanal Vessel	14.9997	-17.317	M. senegalensis	I47	MZ703376
i48	M. senegalensis	43	H	17/06/2020	17H30	300	Artisanal Vessel	14.9997	-17.317	M. senegalensis	I48	MZ703374
i49	M. senegalensis	43	H	17/06/2020	17H30	300	Artisanal Vessel	14.9997	-17.317	M. senegalensis	I49	MZ703395
i50	M. senegalensis	49.5	H	17/06/2020	17H30	300	Artisanal Vessel	14.9997	-17.317	M. senegalensis	I50	MZ703376
i51	M. senegalensis	50.5	H	17/06/2020	17H30	300	Artisanal Vessel	14.9997	-17.317	M. senegalensis	I51	MZ703376
i52	M. polli	53.5	H	17/06/2020	17H30	300	Artisanal Vessel	14.9997	-17.317	M. senegalensis	I52	MZ703376
i53	M. polli	48	H	17/06/2020	17H30	300	Artisanal Vessel	14.9997	-17.317	M. senegalensis	I53	MZ703376
i54	M. polli	52	H	17/06/2020	17H30	300	Artisanal Vessel	14.9997	-17.317	M. senegalensis	I54	MZ703376
i55	M. polli	51.5	H	17/06/2020	17H30	300	Artisanal Vessel	14.9997	-17.317	M. senegalensis	I55	MZ703396
i56	M. polli	51.5	H	17/06/2020	17H30	300	Artisanal Vessel	14.9997	-17.317	M. senegalensis	I56	MZ703376
i57	M. polli	44.5	H	17/06/2020	17H30	300	Artisanal Vessel	14.9997	-17.317	M. senegalensis	I57	MZ703376
i58	M. polli	52.5	H	17/06/2020	17H30	300	Artisanal Vessel	14.9997	-17.317	M. senegalensis	I58	MZ703376
i59	M. polli	52	H	17/06/2020	17H30	300	Artisanal Vessel	14.9997	-17.317	M. senegalensis	I59	MZ703376
i60	M. polli	45.5	H	17/06/2020	17H30	300	Artisanal Vessel	14.9997	-17.317	M. senegalensis	I60	MZ703376
i61	M. polli	52.5	H	17/06/2020	17H30	300	Artisanal Vessel	14.9997	-17.317	M. senegalensis	I61	MZ703397
i62	M. polli	50	H	17/06/2020	17H30	300	Artisanal Vessel	14.9997	-17.317	M. senegalensis	I62	MZ703398
i63	M. polli	45	H	17/06/2020	17H30	300	Artisanal Vessel	14.9997	-17.317	M. senegalensis	I63	MZ703376
i64	M. polli	50.5	H	17/06/2020	17H30	300	Artisanal Vessel	14.9997	-17.317	M. senegalensis	I64	MZ703376
i65	M. polli	52	H	17/06/2020	17H30	300	Artisanal Vessel	14.9997	-17.317	M. senegalensis	I65	MZ703376
i66	M. polli	47.5	H	17/06/2020	17H30	300	Artisanal Vessel	14.9997	-17.317	M. senegalensis	I66	MZ703376
i67	M. polli	55.5	H	17/06/2020	17H30	300	Artisanal Vessel	14.9997	-17.317	M. senegalensis	I67	MZ703376
i68	M. polli	46.5	H	17/06/2020	17H30	300	Artisanal Vessel	14.9997	-17.317	M. senegalensis	I68	MZ703374
i69	M. polli	51.5	H	17/06/2020	17H30	300	Artisanal Vessel	14.9997	-17.317	M. senegalensis	I69	MZ703376
i70	M. polli	48.5	H	17/06/2020	17H30	300	Artisanal Vessel	14.9997	-17.317	M. senegalensis	I70	MZ703376
i71	M. polli	53	H	17/06/2020	17H30	300	Artisanal Vessel	14.9997	-17.317	M. senegalensis	I71	MZ703376
i72	M. polli	54.5	H	17/06/2020	17H30	300	Artisanal Vessel	14.9997	-17.317	M. senegalensis	I72	MZ703376
i73	M. polli	53.5	M	17/06/2020	17H30	300	Artisanal Vessel	14.9997	-17.317	M. senegalensis	I73	MZ703376
i74	M. polli	50.5	M	17/06/2020	17H30	300	Artisanal Vessel	14.9997	-17.317	M. senegalensis	I74	MZ703376
i75	M. polli	44.5	H	17/06/2020	17H30	300	Artisanal Vessel	14.9997	-17.317	M. senegalensis	I75	MZ703376
i76	M. polli	48.5	H	17/06/2020	17H30	300	Artisanal Vessel	14.9997	-17.317	M. senegalensis	I76	MZ703376
i77	M. polli	68.5	H	17/06/2020	17H30	300	Artisanal Vessel	14.9997	-17.317	M. senegalensis	I77	MZ703376
i78	M. polli	53.5	H	17/06/2020	17H30	300	Artisanal Vessel	14.9997	-17.317	M. senegalensis	I78	MZ703376
i79	M. polli	50.5	H	17/06/2020	17H30	300	Artisanal Vessel	14.9997	-17.317	M. senegalensis	I79	MZ703376
i80	M. polli	54	H	17/06/2020	17H30	300	Artisanal Vessel	14.9997	-17.317	M. senegalensis	I80	MZ703376
i81	M. polli	54	H	17/06/2020	17H30	300	Artisanal Vessel	14.9997	-17.317	M. senegalensis	I81	MZ703376
i82	M. polli	47.5	H	17/06/2020	17H30	300	Artisanal Vessel	14.9997	-17.317	M. senegalensis	I82	MZ703376
i83	M. polli	53.5	H	17/06/2020	17H30	300	Artisanal Vessel	14.9997	-17.317	M. senegalensis	I83	MZ703376
i84	M. polli	50.5	H	17/06/2020	17H30	300	Artisanal Vessel	14.9997	-17.317	M. senegalensis	I84	MZ703376
i85	M. polli	38	H	17/06/2020	17H30	300	Artisanal Vessel	14.9997	-17.317	M. senegalensis	I85	MZ703399
i87	M. polli	48	H	17/06/2020	17H30	300	Artisanal Vessel	14.9997	-17.317	M. senegalensis	I87	MZ703376
i88	M. polli	49	H	17/06/2020	17H30	300	Artisanal Vessel	14.9997	-17.317	M. senegalensis	I88	MZ703376
i89	M. polli	53	H	17/06/2020	17H30	300	Artisanal Vessel	14.9997	-17.317	M. senegalensis	I89	MZ703376
i90	M. polli	55	H	17/06/2020	17H30	300	Artisanal Vessel	14.9997	-17.317	M. senegalensis	I90	MZ703376
i91	M. polli	50.5	H	17/06/2020	17H30	300	Artisanal Vessel	14.9997	-17.317	M. senegalensis	I91	MZ703376
i92	M. polli	49	H	17/06/2020	17H30	300	Artisanal Vessel	14.9997	-17.317	M. senegalensis	I92	MZ703376
i93	M. polli	50.5	H	17/06/2020	17H30	300	Artisanal Vessel	14.9997	-17.317	M. senegalensis	I93	MZ703376
i94	M. polli	56.5	H	17/06/2020	17H30	300	Artisanal Vessel	14.9997	-17.317	M. senegalensis	I94	MZ703374
i95	M. polli	50	H	17/06/2020	17H30	300	Artisanal Vessel	14.9997	-17.317	M. senegalensis	I95	MZ703376
i96	M. polli	41	H	17/06/2020	17H30	300	Artisanal Vessel	14.9997	-17.317	M. senegalensis	I96	MZ703374
i97	M. polli	46	H	17/06/2020	17H30	300	Artisanal Vessel	14.9997	-17.317	M. senegalensis	I97	MZ703376
i98	M. polli	49.5	H	17/06/2020	17H30	300	Artisanal Vessel	14.9997	-17.317	M. senegalensis	I98	MZ703376
i99	M. polli	47.5	H	17/06/2020	17H30	300	Artisanal Vessel	14.9997	-17.317	M. senegalensis	I99	MZ703376
i100	M. polli	47	H	17/06/2020	17H30	300	Artisanal Vessel	14.9997	-17.317	M. senegalensis	I100	MZ703376
J01	M. senegalensis	52	H	17/06/2020	17H30	300	Artisanal Vessel	15	-17.3108	M. senegalensis	J01	MZ703376
J02	M. senegalensis	51.5	H	17/06/2020	17H30	300	Artisanal Vessel	15	-17.3108	M. senegalensis	J02	MZ703376
J03	M. senegalensis	53	H	17/06/2020	17H30	300	Artisanal Vessel	15	-17.3108	M. senegalensis	J03	MZ703376
J04	M. senegalensis	52.5	H	17/06/2020	17H30	300	Artisanal Vessel	15	-17.3108	M. senegalensis	J04	MZ703376
J05	M. senegalensis	40	H	17/06/2020	17H30	300	Artisanal Vessel	15	-17.3108	M. senegalensis	J05	MZ703376
J06	M. senegalensis	57.5	H	17/06/2020	17H30	300	Artisanal Vessel	15	-17.3108	M. senegalensis	J06	MZ703376
J07	M. senegalensis	53	H	17/06/2020	17H30	300	Artisanal Vessel	15	-17.3108	M. senegalensis	J07	MZ703374
J08	M. senegalensis	55	H	17/06/2020	17H30	300	Artisanal Vessel	15	-17.3108	M. senegalensis	J08	MZ703374
J09	M. senegalensis	47	H	17/06/2020	17H30	300	Artisanal Vessel	15	-17.3108	M. senegalensis	J09	MZ703376
J10	M. senegalensis	51	H	17/06/2020	17H30	300	Artisanal Vessel	15	-17.3108	M. senegalensis	J10	MZ703376
J100	M. polli	42	M	17/06/2020	17H30	300	Artisanal Vessel	15	-17.3108	M. senegalensis	J100	MZ703376
J11	M. senegalensis	46	H	17/06/2020	17H30	300	Artisanal Vessel	15	-17.3108	M. senegalensis	J11	MZ703376
J12	M. senegalensis	52.5	H	17/06/2020	17H30	300	Artisanal Vessel	15	-17.3108	M. senegalensis	J12	MZ703376
J13	M. senegalensis	50	H	17/06/2020	17H30	300	Artisanal Vessel	15	-17.3108	M. senegalensis	J13	MZ703376
J14	M. senegalensis	50	H	17/06/2020	17H30	300	Artisanal Vessel	15	-17.3108	M. senegalensis	J14	MZ703376
J15	M. senegalensis	50.5	H	17/06/2020	17H30	300	Artisanal Vessel	15	-17.3108	M. senegalensis	J15	MZ703400
J16	M. senegalensis	50.5	M	17/06/2020	17H30	300	Artisanal Vessel	15	-17.3108	M. senegalensis	J16	MZ703374
J17	M. senegalensis	42	M	17/06/2020	17H30	300	Artisanal Vessel	15	-17.3108	M. senegalensis	J17	MZ703376
J18	M. senegalensis	41	M	17/06/2020	17H30	300	Artisanal Vessel	15	-17.3108	M. senegalensis	J18	MZ703376
J19	M. senegalensis	37	M	17/06/2020	17H30	300	Artisanal Vessel	15	-17.3108	M. senegalensis	J19	MZ703376
J20	M. senegalensis	54.5	H	17/06/2020	17H30	300	Artisanal Vessel	15	-17.3108	M. senegalensis	J20	MZ703376
J21	M. senegalensis	47	H	17/06/2020	17H30	300	Artisanal Vessel	15	-17.3108	M. senegalensis	J21	MZ703376
J22	M. senegalensis	43.5	M	17/06/2020	17H30	300	Artisanal Vessel	15	-17.3108	M. senegalensis	J22	MZ703376
J23	M. senegalensis	39.5	H	17/06/2020	17H30	300	Artisanal Vessel	15	-17.3108	M. senegalensis	J23	MZ703376
J24	M. senegalensis	51	H	17/06/2020	17H30	300	Artisanal Vessel	15	-17.3108	M. senegalensis	J24	MZ703376
J25	M. senegalensis	51	H	17/06/2020	17H30	300	Artisanal Vessel	15	-17.3108	M. senegalensis	J25	MZ703374
J26	M. senegalensis	47	H	17/06/2020	17H30	300	Artisanal Vessel	15	-17.3108	M. senegalensis	J26	MZ703376
J27	M. senegalensis	49.5	H	17/06/2020	17H30	300	Artisanal Vessel	15	-17.3108	M. senegalensis	J27	MZ703376
J28	M. senegalensis	54	H	17/06/2020	17H30	300	Artisanal Vessel	15	-17.3108	M. senegalensis	J28	MZ703376
J29	M. senegalensis	51	H	17/06/2020	17H30	300	Artisanal Vessel	15	-17.3108	M. senegalensis	J29	MZ703376
J30	M. senegalensis	52	H	17/06/2020	17H30	300	Artisanal Vessel	15	-17.3108	M. senegalensis	J30	MZ703376
J31	M. senegalensis	54	H	17/06/2020	17H30	300	Artisanal Vessel	15	-17.3108	M. senegalensis	J31	MZ703376
J32	M. senegalensis	49.5	H	17/06/2020	17H30	300	Artisanal Vessel	15	-17.3108	M. senegalensis	J32	MZ703376
J33	M. senegalensis	51	H	17/06/2020	17H30	300	Artisanal Vessel	15	-17.3108	M. senegalensis	J33	MZ703376
J34	M. senegalensis	46.5	H	17/06/2020	17H30	300	Artisanal Vessel	15	-17.3108	M. senegalensis	J34	MZ703376
J35	M. senegalensis	53.5	H	17/06/2020	17H30	300	Artisanal Vessel	15	-17.3108	M. senegalensis	J35	MZ703376
J36	M. senegalensis	44	H	17/06/2020	17H30	300	Artisanal Vessel	15	-17.3108	M. senegalensis	J36	MZ703376
J37	M. senegalensis	52	H	17/06/2020	17H30	300	Artisanal Vessel	15	-17.3108	M. senegalensis	J37	MZ703393
J38	M. senegalensis	51	H	17/06/2020	17H30	300	Artisanal Vessel	15	-17.3108	M. senegalensis	J38	MZ703376
J39	M. polli	50	H	17/06/2020	17H30	300	Artisanal Vessel	15	-17.3108	M. senegalensis	J39	MZ703376
J40	M. polli	47	H	17/06/2020	17H30	300	Artisanal Vessel	15	-17.3108	M. senegalensis	J40	MZ703376
J41	M. polli	39	M	17/06/2020	17H30	300	Artisanal Vessel	15	-17.3108	M. senegalensis	J41	MZ703376
J42	M. polli	45	H	17/06/2020	17H30	300	Artisanal Vessel	15	-17.3108	M. senegalensis	J42	MZ703376
J43	M. polli	49	H	17/06/2020	17H30	300	Artisanal Vessel	15	-17.3108	M. senegalensis	J43	MZ703376
J44	M. polli	51.5	H	17/06/2020	17H30	300	Artisanal Vessel	15	-17.3108	M. senegalensis	J44	MZ703374
J45	M. polli	50	H	17/06/2020	17H30	300	Artisanal Vessel	15	-17.3108	M. senegalensis	J45	MZ703376
J46	M. polli	38.5	H	17/06/2020	17H30	300	Artisanal Vessel	15	-17.3108	M. senegalensis	J46	MZ703401
J47	M. polli	57.5	H	17/06/2020	17H30	300	Artisanal Vessel	15	-17.3108	M. senegalensis	J47	MZ703381
J48	M. polli	52	H	17/06/2020	17H30	300	Artisanal Vessel	15	-17.3108	M. senegalensis	J48	MZ703376
J49	M. polli	50	H	17/06/2020	17H30	300	Artisanal Vessel	15	-17.3108	M. senegalensis	J49	MZ703376
J50	M. polli	48.5	H	17/06/2020	17H30	300	Artisanal Vessel	15	-17.3108	M. senegalensis	J50	MZ703376
J51	M. polli	51.5	H	17/06/2020	17H30	300	Artisanal Vessel	15	-17.3108	M. senegalensis	J51	MZ703376
J52	M. polli	54	H	17/06/2020	17H30	300	Artisanal Vessel	15	-17.3108	M. senegalensis	J52	MZ703376
J53	M. polli	51.5	H	17/06/2020	17H30	300	Artisanal Vessel	15	-17.3108	M. senegalensis	J53	MZ703376
J54	M. polli	51	H	17/06/2020	17H30	300	Artisanal Vessel	15	-17.3108	M. senegalensis	J54	MZ703376
J55	M. polli	53.5	H	17/06/2020	17H30	300	Artisanal Vessel	15	-17.3108	M. senegalensis	J55	MZ703376
J56	M. senegalensis	48	H	17/06/2020	17H30	300	Artisanal Vessel	15	-17.3108	M. senegalensis	J56	MZ703376
J57	M. senegalensis	52	H	17/06/2020	17H30	300	Artisanal Vessel	15	-17.3108	M. senegalensis	J57	MZ703376
J58	M. senegalensis	45	H	17/06/2020	17H30	300	Artisanal Vessel	15	-17.3108	M. senegalensis	J58	MZ703376
J59	M. senegalensis	55.5	M	17/06/2020	17H30	300	Artisanal Vessel	15	-17.3108	M. senegalensis	J59	MZ703376
J60	M. senegalensis	49.5	H	17/06/2020	17H30	300	Artisanal Vessel	15	-17.3108	M. senegalensis	J60	MZ703376
J61	M. senegalensis	52	H	17/06/2020	17H30	300	Artisanal Vessel	15	-17.3108	M. senegalensis	J61	MZ703376
J62	M. senegalensis	48	H	17/06/2020	17H30	300	Artisanal Vessel	15	-17.3108	M. senegalensis	J62	MZ703376
J63	M. senegalensis	52	H	17/06/2020	17H30	300	Artisanal Vessel	15	-17.3108	M. senegalensis	J63	MZ703374
J64	M. senegalensis	38.5	H	17/06/2020	17H30	300	Artisanal Vessel	15	-17.3108	M. senegalensis	J64	MZ703376
J65	M. senegalensis	38.5	H	17/06/2020	17H30	300	Artisanal Vessel	15	-17.3108	M. senegalensis	J65	MZ703402
J66	M. senegalensis	55.5	H	17/06/2020	17H30	300	Artisanal Vessel	15	-17.3108	M. senegalensis	J66	MZ703374
J67	M. senegalensis	46	H	17/06/2020	17H30	300	Artisanal Vessel	15	-17.3108	M. senegalensis	J67	MZ703403
J68	M. senegalensis	43.5	H	17/06/2020	17H30	300	Artisanal Vessel	15	-17.3108	M. senegalensis	J68	MZ703376
J69	M. senegalensis	55.5	H	17/06/2020	17H30	300	Artisanal Vessel	15	-17.3108	M. senegalensis	J69	MZ703376
J70	M. senegalensis	48.5	H	17/06/2020	17H30	300	Artisanal Vessel	15	-17.3108	M. senegalensis	J70	MZ703376
J71	M. senegalensis	41.5	M	17/06/2020	17H30	300	Artisanal Vessel	15	-17.3108	M. senegalensis	J71	MZ703376
J72	M. senegalensis	50.5	H	17/06/2020	17H30	300	Artisanal Vessel	15	-17.3108	M. senegalensis	J72	MZ703376
J73	M. senegalensis	56.5	H	17/06/2020	17H30	300	Artisanal Vessel	15	-17.3108	M. senegalensis	J73	MZ703376
J74	M. senegalensis	46.5	H	17/06/2020	17H30	300	Artisanal Vessel	15	-17.3108	M. senegalensis	J74	MZ703376
J75	M. senegalensis	50	H	17/06/2020	17H30	300	Artisanal Vessel	15	-17.3108	M. senegalensis	J75	MZ703376
J76	M. senegalensis	48.5	H	17/06/2020	17H30	300	Artisanal Vessel	15	-17.3108	M. senegalensis	J76	MZ703374
J77	M. senegalensis	43.5	M	17/06/2020	17H30	300	Artisanal Vessel	15	-17.3108	M. senegalensis	J77	MZ703402
J78	M. senegalensis	35.5	H	17/06/2020	17H30	300	Artisanal Vessel	15	-17.3108	M. senegalensis	J78	MZ703376
J79	M. senegalensis	49.5	H	17/06/2020	17H30	300	Artisanal Vessel	15	-17.3108	M. senegalensis	J79	MZ703376
J80	M. senegalensis	34.5	H	17/06/2020	17H30	300	Artisanal Vessel	15	-17.3108	M. senegalensis	J80	MZ703404
J81	M. senegalensis	35	H	17/06/2020	17H30	300	Artisanal Vessel	15	-17.3108	M. senegalensis	J81	MZ703376
J82	M. polli	53.5	H	17/06/2020	17H30	300	Artisanal Vessel	15	-17.3108	M. senegalensis	J82	MZ703405
J85	M. polli	50	H	17/06/2020	17H30	300	Artisanal Vessel	15	-17.3108	M. senegalensis	J85	MZ703376
J86	M. polli	51	H	17/06/2020	17H30	300	Artisanal Vessel	15	-17.3108	M. senegalensis	J86	MZ703376
J87	M. polli	52	H	17/06/2020	17H30	300	Artisanal Vessel	15	-17.3108	M. senegalensis	J87	MZ703374
J88	M. polli	31.5	M	17/06/2020	17H30	300	Artisanal Vessel	15	-17.3108	M. senegalensis	J88	MZ703376
J89	M. polli	35.5	M	17/06/2020	17H30	300	Artisanal Vessel	15	-17.3108	M. senegalensis	J89	MZ703376
J91	M. polli	46	H	17/06/2020	17H30	300	Artisanal Vessel	15	-17.3108	M. senegalensis	J91	MZ703376
J92	M. polli	55.5	H	17/06/2020	17H30	300	Artisanal Vessel	15	-17.3108	M. senegalensis	J92	MZ703376
J93	M. polli	49.5	H	17/06/2020	17H30	300	Artisanal Vessel	15	-17.3108	M. senegalensis	J93	MZ703376
J94	M. polli	56	H	17/06/2020	17H30	300	Artisanal Vessel	15	-17.3108	M. senegalensis	J94	MZ703374
J95	M. polli	45.5	H	17/06/2020	17H30	300	Artisanal Vessel	15	-17.3108	M. senegalensis	J95	MZ703406
J96	M. polli	43.5	H	17/06/2020	17H30	300	Artisanal Vessel	15	-17.3108	M. senegalensis	J96	MZ703376
J97	M. polli	45.5	H	17/06/2020	17H30	300	Artisanal Vessel	15	-17.3108	M. senegalensis	J97	MZ703376
J98	M. polli	41.5	M	17/06/2020	17H30	300	Artisanal Vessel	15	-17.3108	M. senegalensis	J98	MZ703374
J99	M. polli	43.5	H	17/06/2020	17H30	300	Artisanal Vessel	15	-17.3108	M. senegalensis	J99	MZ703376
